# Supplementary material
Source: publisher figshare collection journal article supplement (https://gsajournals.figshare.com/articles/dataset/_/12732782)
Supplement: Supplementary file 1 [file 2]

# Generalities

Working directory is notebook directory

```
In[*]:= SetDirectory[NotebookDirectory[]];
```

## Simplifications

Function to simplify, with conditions on the parameters

```
In[*]:= AF[x_] :=
  Assuming[d00 > 0 && d00 < 1 && cDrive > 0 && cDrive ≤ 1 && d0D > 0 && d0D ≥ d00 && dDD > 0 &&
    pD ≥ 0 && pD ≤ 1 && Ntot ≥ 0 && diffHW ∈ Reals && dBB > 0 && dBB < 1 && h0B ≥ 0 && h0B ≤ 1 &&
    hDB ≥ 0 && hDB ≤ 1 && dBB ≥ d00 && dDD ≥ dBB && hD0 ≥ 0 && hD0 ≤ 1 && cBrake > 0 &&
    cBrake ≤ 1 && β00 > 0 && β0D > 0 && βDD > 0 && β0B > 0 && βDB > 0 && βBB > 0 &&
    b > 0 && ω00 ≥ 0 && ω0D ≥ 0 && ωDD ≥ 0 && KK > 0, FullSimplify[x]]
```

## Definitions

Vector of genotype densities

$$\text{In[*]}:= \mathbf{VG} = \begin{pmatrix} n_{00} \\ n_{0D} \\ n_{DD} \\ n_{0B} \\ n_{DB} \\ n_{BB} \end{pmatrix};$$

Vector of fecundities per genotype

$$\text{In[*]}:= \mathbf{\beta G} = \begin{pmatrix} \beta_{00} \\ \beta_{0D} \\ \beta_{DD} \\ \beta_{0B} \\ \beta_{DB} \\ \beta_{BB} \end{pmatrix};$$

Vector of genotype densities scaled by their fecundities

```
In[*]:= scaled = Diagonal[βG.Transpose[VG]];
% // MatrixForm
```

Out[\*]//MatrixForm=

$$\begin{pmatrix} n_{00} \beta_{00} \\ n_{0D} \beta_{0D} \\ n_{DD} \beta_{DD} \\ n_{0B} \beta_{0B} \\ n_{DB} \beta_{DB} \\ n_{BB} \beta_{BB} \end{pmatrix}$$

Matrix of crosses

```
In[*]:= Crossings = Transpose[{scaled}].{scaled};
% // MatrixForm
```

```
Out[*]//MatrixForm=
```

$$\begin{pmatrix} n00^2 \beta00^2 & n00 n0D \beta00 \beta0D & n00 nDD \beta00 \betaDD & n00 n0B \beta00 \beta0B & n00 nDB \beta00 \betaDB & n00 nBE \\ n00 n0D \beta00 \beta0D & n0D^2 \beta0D^2 & n0D nDD \beta0D \betaDD & n0B n0D \beta0B \beta0D & n0D nDB \beta0D \betaDB & n0D nBE \\ n00 nDD \beta00 \betaDD & n0D nDD \beta0D \betaDD & nDD^2 \betaDD^2 & n0B nDD \beta0B \betaDD & nDB nDD \betaDB \betaDD & nBB nDD \\ n00 n0B \beta00 \beta0B & n0B n0D \beta0B \beta0D & n0B nDD \beta0B \betaDD & n0B^2 \beta0B^2 & n0B nDB \beta0B \betaDB & n0B nBE \\ n00 nDB \beta00 \betaDB & n0D nDB \beta0D \betaDB & nDB nDD \betaDB \betaDD & n0B nDB \beta0B \betaDB & nDB^2 \betaDB^2 & nBB nDB \\ n00 nBB \beta00 \betaBB & n0D nBB \beta0D \betaBB & nBB nDD \betaBB \betaDD & n0B nBB \beta0B \betaBB & nBB nDB \betaBB \betaDB & nBB^2 \end{pmatrix}$$

Matrices for the outputs of crosses

The crosses are in the same order as the Crossings matrix (rows and columns in the order of the genotype vector);

The values are the probabilities that such a cross gives the focal genotype (focal ID in matrix name).

-> the sum of the 6 matrices is a matrix of ones. This is the law of total probabilities.

-> the sums of all elements of the homozygotes' matrices are the same, likewise for the elements of the heterozygotes' matrices. This is because there is not selection yet so alleles are interchangeable.

$$\text{In[*]}:= \text{Cross00} = \begin{pmatrix} 1 & 1/2 & 0 & 1/2 & 0 & 0 \\ 1/2 & 1/4 & 0 & 1/4 & 0 & 0 \\ 0 & 0 & 0 & 0 & 0 & 0 \\ 1/2 & 1/4 & 0 & 1/4 & 0 & 0 \\ 0 & 0 & 0 & 0 & 0 & 0 \\ 0 & 0 & 0 & 0 & 0 & 0 \end{pmatrix};$$

$$\text{In[*]}:= \text{Cross0D} = \begin{pmatrix} 0 & 1/2 & 1 & 0 & 1/2 & 0 \\ 1/2 & 1/2 & 1/2 & 1/4 & 1/4 & 0 \\ 1 & 1/2 & 0 & 1/2 & 0 & 0 \\ 0 & 1/4 & 1/2 & 0 & 1/4 & 0 \\ 1/2 & 1/4 & 0 & 1/4 & 0 & 0 \\ 0 & 0 & 0 & 0 & 0 & 0 \end{pmatrix};$$

$$\text{In[*]}:= \text{CrossDD} = \begin{pmatrix} 0 & 0 & 0 & 0 & 0 & 0 \\ 0 & 1/4 & 1/2 & 0 & 1/4 & 0 \\ 0 & 1/2 & 1 & 0 & 1/2 & 0 \\ 0 & 0 & 0 & 0 & 0 & 0 \\ 0 & 1/4 & 1/2 & 0 & 1/4 & 0 \\ 0 & 0 & 0 & 0 & 0 & 0 \end{pmatrix};$$

$$\text{In[*]}:= \text{Cross0B} = \begin{pmatrix} 0 & 0 & 0 & 1/2 & 1/2 & 1 \\ 0 & 0 & 0 & 1/4 & 1/4 & 1/2 \\ 0 & 0 & 0 & 0 & 0 & 0 \\ 1/2 & 1/4 & 0 & 1/2 & 1/4 & 1/2 \\ 1/2 & 1/4 & 0 & 1/4 & 0 & 0 \\ 1 & 1/2 & 0 & 1/2 & 0 & 0 \end{pmatrix};$$

$$\text{In[*]}:= \text{CrossDB} = \begin{pmatrix} 0 & 0 & 0 & 0 & 0 & 0 \\ 0 & 0 & 0 & 1/4 & 1/4 & 1/2 \\ 0 & 0 & 0 & 1/2 & 1/2 & 1 \\ 0 & 1/4 & 1/2 & 0 & 1/4 & 0 \\ 0 & 1/4 & 1/2 & 1/4 & 1/2 & 1/2 \\ 0 & 1/2 & 1 & 0 & 1/2 & 0 \end{pmatrix};$$

$$\text{In[*]:= CrossBB} = \begin{pmatrix} 0 & 0 & 0 & 0 & 0 & 0 \\ 0 & 0 & 0 & 0 & 0 & 0 \\ 0 & 0 & 0 & 0 & 0 & 0 \\ 0 & 0 & 0 & 1/4 & 1/4 & 1/2 \\ 0 & 0 & 0 & 1/4 & 1/4 & 1/2 \\ 0 & 0 & 0 & 1/2 & 1/2 & 1 \end{pmatrix};$$

Check that the sums are OK

```

In[*]:= {Total[Total[Cross00]], Total[Total[CrossDD]], Total[Total[CrossBB]]}
{Total[Total[Cross0D]], Total[Total[Cross0B]], Total[Total[CrossDB]]}
Cross00 + CrossDD + CrossBB + Cross0D + Cross0B + CrossDB // MatrixForm

```

```
Out[*]= {4, 4, 4}
```

```
Out[*]= {8, 8, 8}
```

```
Out[*]//MatrixForm=
```

$$\begin{pmatrix} 1 & 1 & 1 & 1 & 1 & 1 \\ 1 & 1 & 1 & 1 & 1 & 1 \\ 1 & 1 & 1 & 1 & 1 & 1 \\ 1 & 1 & 1 & 1 & 1 & 1 \\ 1 & 1 & 1 & 1 & 1 & 1 \\ 1 & 1 & 1 & 1 & 1 & 1 \end{pmatrix}$$

Check formula

```
In[*]:= {scaled}.Cross00.scaled // MatrixForm
```

```
Out[*]//MatrixForm=
```

$$\left( n_{0B} \beta_{0B} \left( \frac{n_{00} \beta_{00}}{2} + \frac{n_{0B} \beta_{0B}}{4} + \frac{n_{0D} \beta_{0D}}{4} \right) + n_{0D} \beta_{0D} \left( \frac{n_{00} \beta_{00}}{2} + \frac{n_{0B} \beta_{0B}}{4} + \frac{n_{0D} \beta_{0D}}{4} \right) + n_{00} \beta_{00} \left( n_{00} \beta_{00} + \frac{n_{0B} \beta_{0B}}{2} \right) \right)$$

Matrix of gene conversion: transformations of heterozygotes into homozygotes

$c_X$  conversion probability for type X (Drive, Brake). If conversion fails, the allele is unchanged (no resistance).

$$\text{In[*]:= Conversion} = \begin{pmatrix} 1 & 0 & 0 & 0 & 0 & 0 \\ 0 & 1 - c_{\text{Drive}} & 0 & 0 & 0 & 0 \\ 0 & c_{\text{Drive}} & 1 & 0 & 0 & 0 \\ 0 & 0 & 0 & 1 & 0 & 0 \\ 0 & 0 & 0 & 0 & 1 - c_{\text{Brake}} & 0 \\ 0 & 0 & 0 & 0 & c_{\text{Brake}} & 1 \end{pmatrix};$$

Changing the variables : find equivalence between the two sets of variables

WT and drive only

```

In[*]:= Solve[{Ntot == n00 + n0D + nDD, (*
*) pD == (nDD + 1/2 n0D) / Ntot, dHW == n0D / Ntot - 2 pD (1 - pD)},
{n00, n0D, nDD, n0B, nDB, nBB}] // FullSimplify
solCV2 = %[[1]];

```

... Solve: Equations may not give solutions for all "solve" variables.

$$\text{Out[*]= } \left\{ \left\{ n_{00} \rightarrow -\frac{1}{2} N_{\text{tot}} \left( d_{\text{HW}} - 2 (-1 + p_D)^2 \right), \right. \right. \\ \left. \left. n_{0D} \rightarrow N_{\text{tot}} \left( d_{\text{HW}} - 2 (-1 + p_D) p_D \right), n_{DD} \rightarrow -\frac{d_{\text{HW}} N_{\text{tot}}}{2} + N_{\text{tot}} p_D^2 \right\} \right\}$$

Change of variables with WT, Drive and Brake

```

In[*]:= Solve[{Ntot == n00 + n0D + nDD + n0B + nDB + nBB, (*
*) pD == (nDD + 1/2 n0D + 1/2 nDB) / Ntot, diffHW0D ==  $\frac{n0D}{Ntot} - 2 pD (1 - pD - pB)$ , (*
*) pB == (nBB + 1/2 n0B + 1/2 nDB) / Ntot, diffHW0B ==  $\frac{n0B}{Ntot} - 2 pB (1 - pD - pB)$ , (*
*) diffHWDB ==  $\frac{nDB}{Ntot} - 2 pD pB$ }, {n00, n0D, nDD, n0B, nDB, nBB}] // AF
solCV3 = %[[1]];
Out[*]:= {{n00 -> - $\frac{1}{2} Ntot (diffHW0B + diffHW0D - 2 (-1 + pB + pD)^2)$ ,
n0D -> Ntot (diffHW0D - 2 pD (-1 + pB + pD)),
nDD -> - $\frac{1}{2} Ntot (diffHW0D + diffHWDB - 2 pD^2)$ ,
n0B -> Ntot (diffHW0B - 2 pB (-1 + pB + pD)), nDB -> Ntot (diffHWDB + 2 pB pD),
nBB -> - $\frac{1}{2} Ntot (diffHW0B + diffHWDB - 2 pB^2)$ }}

```

## Demographic functions

Linear birth, death with density dependence

```

In[*]:= B1[Ntot_] := b Ntot;
D1[Ntot_] := d1 + d2 Ntot + d3 Ntot^2;

```

Birth with density dependence, constant death

```

In[*]:= demog = {Birth[Ntot] -> Ntot (1 - Ntot / KK),
Death[Ntot] -> 1, Birth'[Ntot] -> 1 -  $\frac{2 Ntot}{KK}$ , Death'[Ntot] -> 0};

```

Model with WT only

```

In[*]:= dNWT =  $\omega00 \beta00^2$  Birth[Ntot] - d00 Death[Ntot] n00 /. n00 -> Ntot
solWTONly = Solve[(dNWT /. demog) == 0, Ntot]
sol0 = solWTONly[[2]];

```

```

Out[*]:=  $\beta00^2 \omega00$  Birth[Ntot] - d00 Ntot Death[Ntot]

```

```

Out[*]:= {{Ntot -> 0}, {Ntot ->  $\frac{-d00 KK + KK \beta00^2 \omega00}{\beta00^2 \omega00}$ }}

```

```

In[*]:= NWT = Ntot /. solWTONly[[2]] // AF

```

```

Out[*]:=  $KK - \frac{d00 KK}{\beta00^2 \omega00}$ 

```

WT viability conditions

```

In[*]:= D[dNWT, Ntot] /. demog /. Ntot -> 0

```

```

Out[*]:= -d00 +  $\beta00^2 \omega00$ 

```

## Check parameters

The parameters are standardised to yield the same equilibrium value of population size (using NWT

above), which is negative in the case of an eradication drive (i.e. the actual equilibrium is then 0).  
So testing the three parameter combinations that we use in the paper:

$$\begin{aligned} In[*] &:= \frac{d}{\beta^2 \omega} /. \{d \rightarrow 1.1, \beta \rightarrow 1, \omega \rightarrow 1\} \\ &\frac{d}{\beta^2 \omega} /. \{d \rightarrow 0.6, \beta \rightarrow 1, \omega \rightarrow 0.545\} \\ &\frac{d}{\beta^2 \omega} /. \{d \rightarrow 0.6, \beta \rightarrow 0.738, \omega \rightarrow 1\} \end{aligned}$$

Out[\*]= 1.1

Out[\*]= 1.10092

Out[\*]= 1.10164

We rounded the parameter values, which is why the combinations are not *exactly* 1.1.

Parameters for replacement drive only used in the stability analysis:

$$\begin{aligned} In[*] &:= \frac{d}{\beta^2 \omega} /. \{d \rightarrow 0.7, \beta \rightarrow 1, \omega \rightarrow 1\} \\ &\frac{d}{\beta^2 \omega} /. \{d \rightarrow 0.6, \beta \rightarrow 1, \omega \rightarrow 0.86\} \\ &\frac{d}{\beta^2 \omega} /. \{d \rightarrow 0.6, \beta \rightarrow 0.93, \omega \rightarrow 1\} \end{aligned}$$

Out[\*]= 0.7

Out[\*]= 0.697674

Out[\*]= 0.693722

## Export to C for the simulations

```
In[*]:= chgvar = {n00 → pop[0], n0D → pop[1],
  nDD → pop[2], n0B → pop[3], nDB → pop[4], nBB → pop[5],
  β00 → beta00, β0D → beta0D, βDD → betaDD, β0B → beta0B,
  βDB → betaDB, βBB → betaBB,
  cDrive → conversionD, cBrake → conversionB,
  Ntot → popsize,
  ω00 → omega00, ω0D → omega0D,
  ωDD → omegaDD, ω0B → omega0B, ωDB → omegaDB, ωBB → omegaBB,
  Birth[Ntot] → popsize * (1 - popsize / K),
  Death[Ntot] → 1};
```

## Other functions to link to C

```
In[ ]:= ComputeNeq[KK_, d00_, dDD_, dBB_, omega00_, omegaDD_, omegaBB_, beta00_,
  betaDD_, betaBB_, hD0_, hB0_, hDB_, conversionD_, conversionB_,
  N0D_, freqIntroduction_, N0B_, MAXTIME_, convType_, NREPS_] :=
  {  $\frac{-d00\text{ KK} + \text{KK}\beta00^2\omega00}{\beta00^2\omega00}$ ,  $\frac{-dDD\text{ KK} + \text{KK}\beta DD^2\omega DD}{\beta DD^2\omega DD}$ ,
     $\frac{-dBB\text{ KK} + \text{KK}\beta BB^2\omega BB}{\beta BB^2\omega BB}$  }
```

Parameters chosen in the simulations

```
In[ ]:= simKK = 25 000;
(* Does not restore fitness *)
(* Effects on d *)
ComputeNeq[simKK,
  0.6, 1.1, 1.1,
  1.0, 1.0, 1.0,
  1.0, 1.0, 1.0,
  simhD0, simhB0, simhDB,
  0.9, 0.8,
  1000, fI, 100, tfinal, typeconv, nreps]

(* Effects on omega *)
ComputeNeq[simKK,
  0.6, 0.6, 0.6,
  1.0, 0.545, 0.545,
  1.0, 1.0, 1.0,
  h, h, h,
  0.9, 0.8,
  1000, fI, 100, tfinal, typeconv, nreps]

(* Effects of beta *)
ComputeNeq[simKK,
  0.6, 0.6, 0.6,
  1.0, 1.0, 1.0,
  1.0, 0.738, 0.738,
  h, h, h,
  0.9, 0.8,
  1000, fI, 100, tfinal, typeconv, nreps]

(* Restores fitness *)
(* Effects on d *)
ComputeNeq[simKK,
  0.6, 1.1, 0.64,
  1.0, 1.0, 1.0,
  1.0, 1.0, 1.0,
```

```

simhD0, simhB0, simhDB,
0.9, 0.8,
1000, fI, 100, tfinal, typeconv, nreps]

(* Effects on omega *)
ComputeNeq[simKK,
0.6, 0.6, 0.6,
1.0, 0.545, 0.9375,
1.0, 1.0, 1.0,
h, h, h,
0.9, 0.8,
1000, fI, 100, tfinal, typeconv, nreps]

(* Effects of beta *)
ComputeNeq[simKK,
0.6, 0.6, 0.6,
1.0, 1.0, 1.0,
1.0, 0.738, 0.968246,
h, h, h,
0.9, 0.8,
1000, fI, 100, tfinal, typeconv, nreps]

Out[ ]:= {10 000., -2500., -2500.}

Out[ ]:= {10 000., -2522.94, -2522.94}

Out[ ]:= {10 000., -2540.93, -2540.93}

Out[ ]:= {10 000., -2500., 9000.}

Out[ ]:= {10 000., -2522.94, 9000.}

Out[ ]:= {10 000., -2540.93, 9000.01}

```

# Conversion in the germline

## Model with WT and Drive

### Model definition

#### With genotype densities

Crossing matrices : frequency at which a given cross gives the considered genotype

$$In[ ]:= \text{DCross00} = \begin{pmatrix} 1 & 1/2 & 0 \\ 1/2 & 1/4 & 0 \\ 0 & 0 & 0 \end{pmatrix};$$

$$\text{In[*]:= DCrossOD} = \begin{pmatrix} 0 & 1/2 & 1 \\ 1/2 & 1/2 & 1/2 \\ 1 & 1/2 & 0 \end{pmatrix};$$

$$\text{In[*]:= DCrossDD} = \begin{pmatrix} 0 & 0 & 0 \\ 0 & 1/4 & 1/2 \\ 0 & 1/2 & 1 \end{pmatrix};$$

Check that they sum to 1

$$\text{In[*]:= DCrossOO} + \text{DCrossOD} + \text{DCrossDD}$$

$$\text{Out[*]:= } \{ \{1, 1, 1\}, \{1, 1, 1\}, \{1, 1, 1\} \}$$

Vector of abundances of each genotype

$$\text{In[*]:= DVG} = \begin{pmatrix} n_{00} \\ n_{0D} \\ n_{DD} \end{pmatrix};$$

Vector of fecundities

$$\text{In[*]:= D}\beta\text{G} = \begin{pmatrix} \beta_{00} \\ \beta_{0D} \\ \beta_{DD} \end{pmatrix};$$

Conversion matrix

Gene conversion takes place in the germline. With probability  $c_{\text{Drive}}$ , a OD individual will only produce D gametes.

$$\text{In[*]:= DConversion} = \begin{pmatrix} 1 & 0 & 0 \\ 0 & 1 - c_{\text{Drive}} & 0 \\ 0 & c_{\text{Drive}} & 1 \end{pmatrix};$$

$$\text{In[*]:= DConversion.DVG // MatrixForm}$$

Out[\*]//MatrixForm=

$$\begin{pmatrix} n_{00} \\ n_{0D} (1 - c_{\text{Drive}}) \\ n_{DD} + n_{0D} c_{\text{Drive}} \end{pmatrix}$$

Abundances of the precursors of gametes of each genotype

$$\text{In[*]:= Dscaled} = \text{DConversion.Diagonal[D}\beta\text{G.Transpose[DVG]]};$$

$$\% // \text{MatrixForm}$$

Out[\*]//MatrixForm=

$$\begin{pmatrix} n_{00} \beta_{00} \\ n_{0D} \beta_{0D} (1 - c_{\text{Drive}}) \\ n_{DD} \beta_{DD} + n_{0D} \beta_{0D} c_{\text{Drive}} \end{pmatrix}$$

Abundances of zygotes of each type



$$\text{In[*]:= DVEgg} = \left( \begin{Bmatrix} \{\text{Dscaled}\}.\text{DCross00.Dscaled} \\ \{\text{Dscaled}\}.\text{DCross0D.Dscaled} \\ \{\text{Dscaled}\}.\text{DCrossDD.Dscaled} \end{Bmatrix} \right) / (\text{Ntot})^2 // \text{FullSimplify} // \text{Flatten}$$

$$\text{Out[*]:=} \left\{ \frac{(2 n00 \beta00 + n0D \beta0D - n0D \beta0D c_{Drive})^2}{4 \text{Ntot}^2}, \frac{(2 n00 \beta00 + n0D \beta0D - n0D \beta0D c_{Drive}) (n0D \beta0D + 2 nDD \betaDD + n0D \beta0D c_{Drive})}{2 \text{Ntot}^2}, \frac{(n0D \beta0D + 2 nDD \betaDD + n0D \beta0D c_{Drive})^2}{4 \text{Ntot}^2} \right\}$$

Dynamics of each genotype

$$\begin{aligned} \text{In[*]:= DdGn00} &= \text{DVEgg}[[1]] \omega00 \text{Birth}[\text{Ntot}] - d00 \text{Death}[\text{Ntot}] n00 \\ \text{DdGn0D} &= \text{DVEgg}[[2]] \omega0D \text{Birth}[\text{Ntot}] - d0D \text{Death}[\text{Ntot}] n0D \\ \text{DdGnDD} &= \text{DVEgg}[[3]] \omegaDD \text{Birth}[\text{Ntot}] - dDD \text{Death}[\text{Ntot}] nDD \end{aligned}$$

$$\text{Out[*]:=} -d00 n00 \text{Death}[\text{Ntot}] + \frac{\omega00 \text{Birth}[\text{Ntot}] (2 n00 \beta00 + n0D \beta0D - n0D \beta0D c_{Drive})^2}{4 \text{Ntot}^2}$$

$$\text{Out[*]:=} -d0D n0D \text{Death}[\text{Ntot}] + \frac{1}{2 \text{Ntot}^2} \omega0D \text{Birth}[\text{Ntot}] (2 n00 \beta00 + n0D \beta0D - n0D \beta0D c_{Drive}) (n0D \beta0D + 2 nDD \betaDD + n0D \beta0D c_{Drive})$$

$$\text{Out[*]:=} -dDD nDD \text{Death}[\text{Ntot}] + \frac{\omegaDD \text{Birth}[\text{Ntot}] (n0D \beta0D + 2 nDD \betaDD + n0D \beta0D c_{Drive})^2}{4 \text{Ntot}^2}$$

Abundances of the alleles (/2)

$$\begin{aligned} \text{In[*]:= DdGn0} &= \text{DdGn00} + 1/2 \text{DdGn0D} // \text{FullSimplify} \\ \text{DdGnD} &= \text{DdGnDD} + 1/2 \text{DdGn0D} // \text{FullSimplify} \end{aligned}$$

$$\begin{aligned} \text{Out[*]:=} &\frac{1}{4} \left( -2 (2 d00 n00 + d0D n0D) \text{Death}[\text{Ntot}] + \right. \\ &\frac{1}{\text{Ntot}^2} \text{Birth}[\text{Ntot}] (2 n00 \beta00 + n0D \beta0D - n0D \beta0D c_{Drive}) \\ &\left. (2 n00 \beta00 \omega00 + 2 nDD \betaDD \omega0D + n0D \beta0D (\omega00 + \omega0D) + n0D \beta0D (-\omega00 + \omega0D) c_{Drive}) \right) \end{aligned}$$

$$\begin{aligned} \text{Out[*]:=} &\frac{1}{4} \left( -2 (d0D n0D + 2 dDD nDD) \text{Death}[\text{Ntot}] + \right. \\ &\frac{1}{\text{Ntot}^2} \text{Birth}[\text{Ntot}] (n0D \beta0D + 2 nDD \betaDD + n0D \beta0D c_{Drive}) \\ &\left. (2 n00 \beta00 \omega0D + 2 nDD \betaDD \omegaDD + n0D \beta0D (\omega0D + \omegaDD) + n0D \beta0D (-\omega0D + \omegaDD) c_{Drive}) \right) \end{aligned}$$

## Change of variables

Total population size Ntot

In[\*]:= **DdGNtot = DdGn0 + DdGnD /. solCV2 // FullSimplify**

$$\begin{aligned} \text{Out[*]} = & \frac{1}{4} \left( 2 \text{Ntot} \left( -2 \text{d0D dHW} + \text{d00} \left( \text{dHW} - 2 \left( -1 + \text{pD} \right)^2 \right) + 4 \text{d0D} \left( -1 + \text{pD} \right) \text{pD} + \text{dDD} \left( \text{dHW} - 2 \text{pD}^2 \right) \right) \right. \\ & \text{Death}[\text{Ntot}] + \text{Birth}[\text{Ntot}] \left( \left( \left( \text{dHW} - 2 \left( -1 + \text{pD} \right)^2 \right) \beta_{00} - \text{dHW} \beta_{0D} + 2 \left( -1 + \text{pD} \right) \text{pD} \beta_{0D} \right) \right. \\ & \left( \left( \text{dHW} - 2 \left( -1 + \text{pD} \right)^2 \right) \beta_{00} \omega_{00} - \left( \text{dHW} - 2 \left( -1 + \text{pD} \right) \text{pD} \right) \beta_{0D} \omega_{00} - \right. \\ & \left. 2 \left( \text{dHW} \left( \beta_{0D} - \beta_{DD} \right) + 2 \text{pD} \left( \beta_{0D} - \text{pD} \beta_{0D} + \text{pD} \beta_{DD} \right) \right) \omega_{0D} \right) + \\ & \left( \text{dHW} \left( \beta_{0D} - \beta_{DD} \right) + 2 \text{pD} \left( \beta_{0D} - \text{pD} \beta_{0D} + \text{pD} \beta_{DD} \right) \right)^2 \omega_{DD} + \\ & \left( \text{dHW} - 2 \left( -1 + \text{pD} \right) \text{pD} \right) \beta_{0D} c_{\text{Drive}} \\ & \left( 2 \left( \left( \text{dHW} - 2 \left( -1 + \text{pD} \right)^2 \right) \beta_{00} \left( \omega_{00} - \omega_{0D} \right) + \text{dHW} \left( \beta_{DD} \left( \omega_{0D} - \omega_{DD} \right) + \beta_{0D} \left( -\omega_{00} + \omega_{DD} \right) \right) \right) + \right. \\ & \left. 2 \text{pD} \left( \left( -1 + \text{pD} \right) \beta_{0D} \left( \omega_{00} - \omega_{DD} \right) + \text{pD} \beta_{DD} \left( -\omega_{0D} + \omega_{DD} \right) \right) \right) + \\ & \left. \left( \text{dHW} - 2 \left( -1 + \text{pD} \right) \text{pD} \right) \beta_{0D} \left( \omega_{00} - 2 \omega_{0D} + \omega_{DD} \right) c_{\text{Drive}} \right) \end{aligned}$$

Frequency of the drive allele

In[\*]:= **DdGpD =  $\frac{\text{DdGnD}}{\text{Ntot}} - \text{pD} \frac{\text{DdGNtot}}{\text{Ntot}}$  /. solCV2 // FullSimplify**

$$\begin{aligned} \text{Out[*]} = & \frac{1}{4 \text{Ntot}} \left( -2 \text{Ntot} \left( \text{d0D} \left( \text{dHW} - 2 \left( -1 + \text{pD} \right) \text{pD} \right) - \text{dDD} \left( \text{dHW} - 2 \text{pD}^2 \right) \right) \text{Death}[\text{Ntot}] + \text{Birth}[\text{Ntot}] \right. \\ & \left( \text{dHW} \left( \beta_{0D} - \beta_{DD} \right) + 2 \text{pD} \left( \beta_{0D} - \text{pD} \beta_{0D} + \text{pD} \beta_{DD} \right) + \left( \text{dHW} - 2 \left( -1 + \text{pD} \right) \text{pD} \right) \beta_{0D} c_{\text{Drive}} \right) \\ & \left( - \left( \text{dHW} - 2 \left( -1 + \text{pD} \right)^2 \right) \beta_{00} \omega_{0D} - \left( \text{dHW} - 2 \text{pD}^2 \right) \beta_{DD} \omega_{DD} + \left( \text{dHW} - 2 \left( -1 + \text{pD} \right) \text{pD} \right) \beta_{0D} \right. \\ & \left. \beta_{0D} \left( \omega_{0D} + \omega_{DD} \right) + \left( \text{dHW} - 2 \left( -1 + \text{pD} \right) \text{pD} \right) \beta_{0D} \left( -\omega_{0D} + \omega_{DD} \right) c_{\text{Drive}} \right) - \\ & \text{pD} \left( 2 \text{Ntot} \left( -2 \text{d0D dHW} + \text{d00} \left( \text{dHW} - 2 \left( -1 + \text{pD} \right)^2 \right) + 4 \text{d0D} \left( -1 + \text{pD} \right) \text{pD} + \text{dDD} \left( \text{dHW} - 2 \text{pD}^2 \right) \right) \right. \\ & \text{Death}[\text{Ntot}] + \\ & \text{Birth}[\text{Ntot}] \left( \left( \left( \text{dHW} - 2 \left( -1 + \text{pD} \right)^2 \right) \beta_{00} - \text{dHW} \beta_{0D} + 2 \left( -1 + \text{pD} \right) \text{pD} \beta_{0D} \right) \right. \\ & \left( \left( \text{dHW} - 2 \left( -1 + \text{pD} \right)^2 \right) \beta_{00} \omega_{0D} + 2 \text{dHW} \beta_{DD} \omega_{0D} - \text{dHW} \beta_{0D} \left( \omega_{00} + 2 \omega_{0D} \right) + \right. \\ & \left. 2 \text{pD} \left( -2 \text{pD} \beta_{DD} \omega_{0D} + \left( -1 + \text{pD} \right) \beta_{0D} \left( \omega_{00} + 2 \omega_{0D} \right) \right) \right) + \\ & \left( \text{dHW} \left( \beta_{0D} - \beta_{DD} \right) + 2 \text{pD} \left( \beta_{0D} - \text{pD} \beta_{0D} + \text{pD} \beta_{DD} \right) \right)^2 \omega_{DD} + \\ & \left( \text{dHW} - 2 \left( -1 + \text{pD} \right) \text{pD} \right) \beta_{0D} c_{\text{Drive}} \\ & \left( 2 \left( \left( \text{dHW} - 2 \left( -1 + \text{pD} \right)^2 \right) \beta_{00} \left( \omega_{00} - \omega_{0D} \right) + \text{dHW} \left( \beta_{DD} \left( \omega_{0D} - \omega_{DD} \right) + \beta_{0D} \left( -\omega_{00} + \right. \right. \right. \\ & \left. \left. \omega_{DD} \right) \right) + 2 \text{pD} \left( \left( -1 + \text{pD} \right) \beta_{0D} \left( \omega_{00} - \omega_{DD} \right) + \text{pD} \beta_{DD} \left( -\omega_{0D} + \omega_{DD} \right) \right) \right) + \\ & \left. \left( \text{dHW} - 2 \left( -1 + \text{pD} \right) \text{pD} \right) \beta_{0D} \left( \omega_{00} - 2 \omega_{0D} + \omega_{DD} \right) c_{\text{Drive}} \right) \end{aligned}$$

Deviation from HW

$$\begin{aligned} \text{Inf}[e] := & \quad \text{DdGHW} = \frac{-n\theta D \text{DdGNtot} + N_{\text{tot}} \left( \text{DdGn}\theta D + 2 N_{\text{tot}} (-1 + pD) \text{DdGP}D \right)}{N_{\text{tot}}^2} /. \text{solCV2} \\ \text{Out}[e] := & \quad \frac{1}{N_{\text{tot}}^2} \left( -\frac{1}{4} N_{\text{tot}} (dHW - 2(-1 + pD)pD) \right. \\ & \quad \left( 2 N_{\text{tot}} (-2 d\theta D dHW + d\theta\theta (dHW - 2(-1 + pD)^2) + 4 d\theta D (-1 + pD)pD + dDD (dHW - 2 pD^2)) \right) \\ & \quad \text{Death}[N_{\text{tot}}] + \\ & \quad \text{Birth}[N_{\text{tot}}] \left( \left( (dHW - 2(-1 + pD))^2 \beta_{\theta\theta} - dHW \beta_{\theta D} + 2(-1 + pD)pD \beta_{\theta D} \right) \right. \\ & \quad \left( (dHW - 2(-1 + pD))^2 \beta_{\theta\theta} \omega_{\theta\theta} - (dHW - 2(-1 + pD)pD \beta_{\theta D}) \beta_{\theta D} \omega_{\theta\theta} - \right. \\ & \quad \left. 2(dHW(\beta_{\theta D} - \beta_{DD}) + 2 pD (\beta_{\theta D} - pD \beta_{\theta D} + pD \beta_{DD})) \omega_{\theta D} \right) + \\ & \quad (dHW(\beta_{\theta D} - \beta_{DD}) + 2 pD (\beta_{\theta D} - pD \beta_{\theta D} + pD \beta_{DD}))^2 \omega_{DD} + \\ & \quad (dHW - 2(-1 + pD)pD \beta_{\theta D} c_{Drive} \\ & \quad \left( 2((dHW - 2(-1 + pD))^2 \beta_{\theta\theta} (\omega_{\theta\theta} - \omega_{\theta D}) + dHW(\beta_{DD}(\omega_{\theta D} - \omega_{DD}) + \beta_{\theta D}(-\omega_{\theta\theta} + \right. \\ & \quad \left. \omega_{DD})) + 2 pD((-1 + pD)\beta_{\theta D}(\omega_{\theta\theta} - \omega_{DD}) + pD \beta_{DD}(-\omega_{\theta D} + \omega_{DD}))) \right) + \\ & \quad \left. (dHW - 2(-1 + pD)pD \beta_{\theta D} (\omega_{\theta\theta} - 2\omega_{\theta D} + \omega_{DD}) c_{Drive}) \right) \Bigg) + \\ & \quad N_{\text{tot}} \left( -d\theta D N_{\text{tot}} (dHW - 2(-1 + pD)pD) \text{Death}[N_{\text{tot}}] + \frac{1}{2 N_{\text{tot}}^2} \right. \\ & \quad \omega_{\theta D} \text{Birth}[N_{\text{tot}}] \left( -N_{\text{tot}} (dHW - 2(-1 + pD))^2 \beta_{\theta\theta} + N_{\text{tot}} (dHW - 2(-1 + pD)pD) \beta_{\theta D} - \right. \\ & \quad \left. N_{\text{tot}} (dHW - 2(-1 + pD)pD) \beta_{\theta D} c_{Drive} \right) \left( N_{\text{tot}} (dHW - 2(-1 + pD)pD) \beta_{\theta D} + \right. \\ & \quad \left. 2 \left( -\frac{dHW N_{\text{tot}}}{2} + N_{\text{tot}} pD^2 \right) \beta_{DD} + N_{\text{tot}} (dHW - 2(-1 + pD)pD) \beta_{\theta D} c_{Drive} \right) + \\ & \quad \frac{1}{2} (-1 + 2 pD) \left( -2 N_{\text{tot}} (d\theta D (dHW - 2(-1 + pD)pD) - dDD (dHW - 2 pD^2)) \text{Death}[N_{\text{tot}}] + \right. \\ & \quad \text{Birth}[N_{\text{tot}}] (dHW(\beta_{\theta D} - \beta_{DD}) + 2 pD (\beta_{\theta D} - pD \beta_{\theta D} + pD \beta_{DD}) + \\ & \quad (dHW - 2(-1 + pD)pD) \beta_{\theta D} c_{Drive}) \\ & \quad \left( -(dHW - 2(-1 + pD))^2 \beta_{\theta\theta} \omega_{\theta D} - (dHW - 2 pD^2) \beta_{DD} \omega_{DD} + (dHW - 2(-1 + pD)pD) \right. \\ & \quad \left. \beta_{\theta D} (\omega_{\theta D} + \omega_{DD}) + (dHW - 2(-1 + pD)pD) \beta_{\theta D} (-\omega_{\theta D} + \omega_{DD}) c_{Drive} \right) - \\ & \quad pD \left( 2 N_{\text{tot}} (-2 d\theta D dHW + d\theta\theta (dHW - 2(-1 + pD)^2) + 4 d\theta D (-1 + pD)pD + dDD (dHW - 2 pD^2)) \right. \\ & \quad \left. \text{Death}[N_{\text{tot}}] + \right. \\ & \quad \text{Birth}[N_{\text{tot}}] \left( \left( (dHW - 2(-1 + pD))^2 \beta_{\theta\theta} - dHW \beta_{\theta D} + 2(-1 + pD)pD \beta_{\theta D} \right) \right. \\ & \quad \left( (dHW - 2(-1 + pD))^2 \beta_{\theta\theta} \omega_{\theta\theta} + 2 dHW \beta_{DD} \omega_{\theta D} - dHW \beta_{\theta D} (\omega_{\theta\theta} + 2 \omega_{\theta D}) + \right. \\ & \quad \left. 2 pD (-2 pD \beta_{DD} \omega_{\theta D} + (-1 + pD) \beta_{\theta D} (\omega_{\theta\theta} + 2 \omega_{\theta D})) \right) + \\ & \quad (dHW(\beta_{\theta D} - \beta_{DD}) + 2 pD (\beta_{\theta D} - pD \beta_{\theta D} + pD \beta_{DD}))^2 \omega_{DD} + \\ & \quad (dHW - 2(-1 + pD)pD) \beta_{\theta D} c_{Drive} \left( 2((dHW - 2(-1 + pD))^2 \beta_{\theta\theta} (\omega_{\theta\theta} - \omega_{\theta D}) + \right. \\ & \quad dHW(\beta_{DD}(\omega_{\theta D} - \omega_{DD}) + \beta_{\theta D}(-\omega_{\theta\theta} + \omega_{DD})) + \\ & \quad \left. 2 pD((-1 + pD)\beta_{\theta D}(\omega_{\theta\theta} - \omega_{DD}) + pD \beta_{DD}(-\omega_{\theta D} + \omega_{DD})) \right) + \\ & \quad \left. (dHW - 2(-1 + pD)pD) \beta_{\theta D} (\omega_{\theta\theta} - 2\omega_{\theta D} + \omega_{DD}) c_{Drive} \right) \Bigg) \Bigg) \end{aligned}$$

## Invasion conditions

## Drive invasion

### Generic WT equilibrium (without specifying the demographic functions)

```
In[*]:= tmp = DdGNtot /. solCV2 /. {pD → 0, dHW → 0} // FullSimplify
```

```
Out[*]:=  $\beta_{00}^2 \omega_{00} \text{Birth}[N_{\text{tot}}] - d_{00} N_{\text{tot}} \text{Death}[N_{\text{tot}}]$ 
```

```
In[*]:=  $D[d_{00} N_{\text{tot}} \text{Death}[N_{\text{tot}}] / (\beta_{00}^2 \omega_{00}), N_{\text{tot}}$ 
```

```
Out[*]:=  $\frac{d_{00} \text{Death}[N_{\text{tot}}]}{\beta_{00}^2 \omega_{00}} + \frac{d_{00} N_{\text{tot}} \text{Death}'[N_{\text{tot}}]}{\beta_{00}^2 \omega_{00}}$ 
```

```
In[*]:= Jac =  $\begin{pmatrix} D[DdGNtot, Ntot] & D[DdGNtot, pD] & D[DdGNtot, dHW] \\ D[DdGpD, Ntot] & D[DdGpD, pD] & D[DdGpD, dHW] \\ D[DdGHW, Ntot] & D[DdGHW, pD] & D[DdGHW, dHW] \end{pmatrix};$ 
```

```
In[*]:= Jac0 = Jac /. {pD → 0, dHW → 0, Birth[Ntot] →  $d_{00} N_{\text{tot}} \text{Death}[N_{\text{tot}}] / (\beta_{00}^2 \omega_{00})$ ,  
Birth'[Ntot] →  $\frac{d_{00} \text{Death}[N_{\text{tot}}]}{\beta_{00}^2 \omega_{00}} + \frac{d_{00} N_{\text{tot}} \text{Death}'[N_{\text{tot}}]}{\beta_{00}^2 \omega_{00}}$ } // AF
```

```
Out[*]:=  $\left\{ \left\{ 0, -\frac{1}{\beta_{00} \omega_{00}} 2 N_{\text{tot}} \text{Death}[N_{\text{tot}}] \right. \right.$   

 $\left. \left( d_{00} \beta_{00} \omega_{00} + d_{0D} \beta_{00} \omega_{00} - d_{00} \beta_{0D} (\omega_{00} + \omega_{0D}) + d_{00} \beta_{0D} (\omega_{00} - \omega_{0D}) c_{\text{Drive}} \right), \right.$   

 $\frac{1}{2 \beta_{00} \omega_{00}} N_{\text{tot}} \text{Death}[N_{\text{tot}}] \left( (-2 d_{0D} + d_{DD}) \beta_{00} \omega_{00} + \right.$   

 $\left. d_{00} (-\beta_{00} \omega_{00} - 2 \beta_{DD} \omega_{0D} + 2 \beta_{0D} (\omega_{00} + \omega_{0D})) + 2 d_{00} \beta_{0D} (-\omega_{00} + \omega_{0D}) c_{\text{Drive}} \right\},$   

 $\left\{ 0, \frac{\text{Death}[N_{\text{tot}}] (-d_{0D} \beta_{00} \omega_{00} + d_{00} \beta_{0D} \omega_{0D} + d_{00} \beta_{0D} \omega_{0D} c_{\text{Drive}})}{\beta_{00} \omega_{00}}, \right.$   

 $\left. \frac{\text{Death}[N_{\text{tot}}] ((-d_{0D} + d_{DD}) \beta_{00} \omega_{00} + d_{00} (\beta_{0D} - \beta_{DD}) \omega_{0D} + d_{00} \beta_{0D} \omega_{0D} c_{\text{Drive}})}{2 \beta_{00} \omega_{00}} \right\},$   

 $\{0, 0, -d_{DD} \text{Death}[N_{\text{tot}}]\}$ 
```

```
In[*]:= Eigenvalues[Jac0] // AF
```

```
Out[*]:=  $\left\{ 0, -d_{DD} \text{Death}[N_{\text{tot}}], \frac{\text{Death}[N_{\text{tot}}] (-d_{0D} \beta_{00} \omega_{00} + d_{00} \beta_{0D} \omega_{0D} + d_{00} \beta_{0D} \omega_{0D} c_{\text{Drive}})}{\beta_{00} \omega_{00}} \right\}$ 
```

Specifying the demographic functions

Check that sol0 is solution (WT equilibrium identified when the demographic functions were defined, above)

```
In[*]:= DdGNtot /. demog /. sol0 /. pD → 0 /. dHW → 0 // AF
```

```
Out[*]:= 0
```

Eigenvalues

```
In[*]:= ev0 = Eigenvalues[Limit[Jac /. demog, {pD → 0, dHW → 0}] /. sol0] // AF
```

```
Out[*]:=  $\left\{ -d_{DD}, d_{00} - \beta_{00}^2 \omega_{00}, \frac{-d_{0D} \beta_{00} \omega_{00} + d_{00} \beta_{0D} \omega_{0D} + d_{00} \beta_{0D} \omega_{0D} c_{\text{Drive}}}{\beta_{00} \omega_{00}} \right\}$ 
```

The first one is negative, because dDD is greater than (or equal to) d00,  
the second one is about 00 only,  
so the one that determines invasion of the drive is the third one.

Write the key eigenvalue to export it into R

```

In[ ]:= evG0 = ev0[[3]];
% /. chgvar // CForm

Out[ ]//CForm= -(beta00*d0D*omega00) + beta0D*d00*omega0D + beta0D*conversionD*d00*omega0D) /

```

## WT invasion -- eradication drive

Demographic equilibrium with drive only (specifying the demographic functions)

```

In[ ]:= DdGNtot /. {pD -> 1, dHW -> 0}
% /. demog
solOnly = Solve[% == 0, Ntot]

Out[ ]:=  $\frac{1}{4} (4 \beta_{DD}^2 \omega_{DD} \text{Birth}[N_{\text{tot}}] - 4 d_{DD} N_{\text{tot}} \text{Death}[N_{\text{tot}}])$ 

Out[ ]:=  $\frac{1}{4} \left( -4 d_{DD} N_{\text{tot}} + 4 N_{\text{tot}} \left( 1 - \frac{N_{\text{tot}}}{K} \right) \beta_{DD}^2 \omega_{DD} \right)$ 

Out[ ]:=  $\left\{ \{N_{\text{tot}} \rightarrow 0\}, \left\{ N_{\text{tot}} \rightarrow \frac{-d_{DD} K + K \beta_{DD}^2 \omega_{DD}}{\beta_{DD}^2 \omega_{DD}} \right\} \right\}$ 

```

We choose conditions such that there is population extinction with the drive ( $N_{\text{tot}} \rightarrow 0$ ):

Check stability conditions in this case (i.e. what are the conditions on the parameters to indeed have an eradication drive)

```

In[ ]:= D[Evaluate[DdGNtot /. {pD -> 1, dHW -> 0} /. demog], Ntot] /. Ntot -> 0
AF[Reduce[% < 0]]

Out[ ]:=  $\frac{1}{4} (-4 d_{DD} + 4 \beta_{DD}^2 \omega_{DD})$ 

Out[ ]:=  $\sqrt{\frac{d_{DD}}{\omega_{DD}}} > \beta_{DD} \mid \mid \omega_{DD} \leq 0$ 

```

Eigenvalues for the stability of the drive-only equilibrium

```

In[ ]:= evD = Eigenvalues[Limit[Jac /. demog, {Ntot -> 0, pD -> 1, dHW -> 0}]] // AF

Out[ ]:=  $\left\{ -d_{DD} + \beta_{DD}^2 \omega_{DD}, -d_{00} + d_{DD} - \beta_{DD}^2 \omega_{DD}, \right.$ 
 $\left. -d_{0D} + d_{DD} + \beta_{0D} \beta_{DD} \omega_{0D} - \beta_{DD}^2 \omega_{DD} - \beta_{0D} \beta_{DD} \omega_{0D} c_{\text{Drive}} \right\}$ 

```

Rewrite them for export in R

```

In[ ]:= evGD1 = evD[[2]];
% /. chgvar // CForm

Out[ ]//CForm= -d00 + dDD - Power(betaDD,2)*omegaDD

In[ ]:= evGD2 = evD[[3]];
% /. chgvar // CForm

Out[ ]//CForm= -d0D + dDD + beta0D*betaDD*omega0D - beta0D*betaDD*conversionD*omega0D - Power

```

## WT invasion -- replacement drive

Here we assume a replacement drive, so use the other equilibrium

`In[ ]:= solDonly[[2]]`

$$Out[ ]:= \left\{ N_{tot} \rightarrow \frac{-d_{DD} K K + K K \beta_{DD}^2 \omega_{DD}}{\beta_{DD}^2 \omega_{DD}} \right\}$$

Check stability conditions in this case

`In[ ]:= D[Evaluate[DdGNtot /. {pD → 1, dHW → 0} /. demog], Ntot] /. solDonly[[2]]`  
`AF[Reduce[% < 0]]`

$$Out[ ]:= \frac{1}{4} \left( -4 d_{DD} - \frac{4 (-d_{DD} K K + K K \beta_{DD}^2 \omega_{DD})}{K K} + 4 \beta_{DD}^2 \omega_{DD} \left( 1 - \frac{-d_{DD} K K + K K \beta_{DD}^2 \omega_{DD}}{K K \beta_{DD}^2 \omega_{DD}} \right) \right)$$

$$Out[ ]:= \beta_{DD} > \sqrt{\frac{d_{DD}}{\omega_{DD}}}$$

Eigenvalues for the stability of the drive-only equilibrium

`In[ ]:= evDr = Eigenvalues[`  
`Limit[Jac /. demog, {Ntot → (Ntot /. solDonly[[2])}, pD → 1, dHW → 0]]] // AF`

$$Out[ ]:= \left\{ -d_{00}, d_{DD} - \beta_{DD}^2 \omega_{DD}, \frac{d_{DD} \beta_{0D} \omega_{0D} - d_{0D} \beta_{DD} \omega_{DD} - d_{DD} \beta_{0D} \omega_{0D} c_{Drive}}{\beta_{DD} \omega_{DD}} \right\}$$

## Plot the types of equilibria -- eradication drive

Function to standardize the way the figures are plotted

`In[ ]:= InvasionPic[P1_, P2_] :=`  
`Show[P1, P2, FrameLabel → {"cDrive", "h0D"}, BaseStyle → {FontSize → 13},`  
`FrameStyle → Directive[FontColor → Black], ImageSize → 200]`

Rename the key eigenvalues

`In[ ]:= EV0 = ev0[[3]];`

`In[ ]:= EVD1 = evD[[3]];`  
`EVD2 = evD[[2]];`

## Adult death only

Here we assume that the effect of the drive (/brake) is only on adult mortality; all other parameters are the same as WT individuals

`In[ ]:= ADO =`  
`{ω00 → 1, ω0D → 1, ωDD → 1, β00 → 1, β0D → 1, βDD → 1, d0D → d00 (1 - h0D) + dDD h0D};`

```

In[ ]:= prms = {d00 → 0.6, dDD → 1.1};
sol0 /. ADO /. prms
ADOP1 = RegionPlot[Evaluate[(EV0 /. ADO /. prms)] < 0,
  {cDrive, 0, 1}, {h0D, 0, 1}, PlotRangePadding → None,
  PlotStyle → RGBColor[0, 0, 1, 0.2], BoundaryStyle → Blue];
ADOP2 = RegionPlot[Evaluate[(EVD1 /. ADO /. prms)] < 0 &&
  Evaluate[(EVD2 /. ADO /. prms)] < 0,
  {cDrive, 0, 1}, {h0D, 0, 1}, PlotRangePadding → None,
  PlotStyle → RGBColor[1, 0, 0, 0.2], BoundaryStyle → Red];
ADG0 = InvasionPic[ADOP1, ADOP2]
Export["../pics/invasionE_Gd.pdf", ADG0]

```

```
Out[ ]:= {Ntot → 0.4 KK}
```

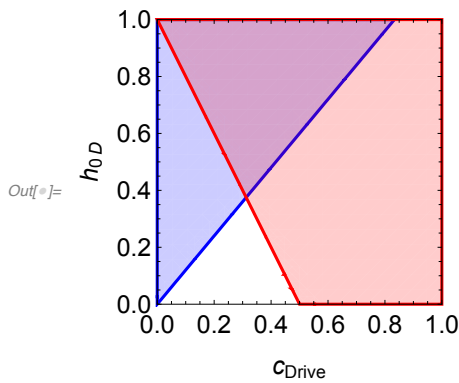

```
Out[ ]:= ../pics/invasionE_Gd.pdf
```

### Legend:

WT - only equilibrium is locally stable in the region left of the blue curve,  
 Drive - only equilibrium is locally stable in the region right of the red curve.

Purple: both equilibria are locally stable; bistability

White: none of the two boundary equilibria is locally stable: coexistence of WT and drive

Interior equilibrium for the parameters tested in R

```

In[ ]:= neqs =
  Flatten[Evaluate[{DdGNtot == 0, DdGpD == 0, DdGHW == 0} /. demog /. ADO /. prms /.
    KK → 25 000 /. h0D → 1 /. cDrive → 0.6]];
NSolve[neqs, {Ntot, pD, dHW}, Reals]
Out[ ]:= {{dHW → 0, pD → 1., Ntot → -2500.},
  {dHW → -0.0330327, pD → 0.195531, Ntot → 5796.09}, {dHW → 0, pD → 0, Ntot → 10 000.}}

```

## Fecundity only

Here we assume that only fecundity is affected by the drive

```

In[ ]:= FO = {w00 → 1, w0D → 1, wDD → 1, d00 → 0.6,
  d0D → 0.6, dDD → 0.6, β0D → β00 (1 - h0D) + βDD h0D};

```

```

In[ ]:= prms = { $\beta_{00} \rightarrow 1$ ,  $\beta_{DD} \rightarrow 0.738$ };
FOP1 = RegionPlot[(EV0 /. FO /. prms) < 0,
  {CDrive, 0, 1}, {h0D, 0, 1}, PlotRangePadding → None,
  PlotStyle → RGBColor[0, 0, 1, 0.2], BoundaryStyle → Blue];
FOP2 = RegionPlot[Evaluate[(EVD1 /. FO /. prms)] < 0 &&
  Evaluate[(EVD2 /. FO /. prms)] < 0,
  {CDrive, 0, 1}, {h0D, 0, 1}, PlotRangePadding → None,
  PlotStyle → RGBColor[1, 0, 0, 0.2], BoundaryStyle → Red];
FG0 = InvasionPic[FOP1, FOP2]
Export["../pics/invasionE_Gbeta.pdf", FG0]

```

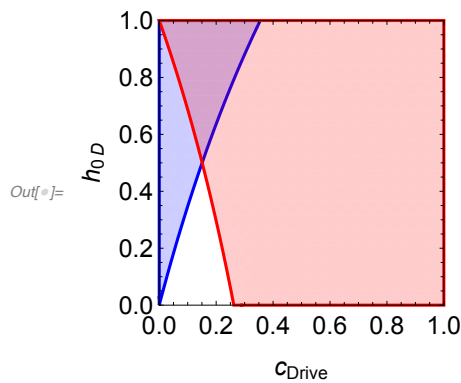

```

Out[ ]:= ../pics/invasionE_Gbeta.pdf

```

**Legend** : see above (Adult death only)

Interior equilibrium for the parameters tested in R

```

In[ ]:= neqs = Flatten[Evaluate[
  {DdGNtot == 0, DdGpD == 0, DdGHW == 0} /. demog /. FO /. prms /. KK → 25 000 /.
  h0D → 1 /. CDrive → 0.3]];
NSolve[neqs, {Ntot, pD, dHW}, Reals]
Out[ ]:= {{dHW → 0, pD → 1., Ntot → -2540.93}, {dHW → 0, pD → 0.154962, Ntot → 7472.42},
  {dHW → 0, pD → 0, Ntot → 10 000.}, {Ntot → 10 000., pD → 0, dHW → 0}}

```

## Zygote viability only

```

In[ ]:= Z0 = {d00 → 0.6, d0D → 0.6, dDD → 0.6,
   $\beta_{00} \rightarrow 1$ ,  $\beta_{0D} \rightarrow 1$ ,  $\beta_{DD} \rightarrow 1$ ,  $\omega_{0D} \rightarrow \omega_{00} (1 - h_{0D}) + \omega_{DD} h_{0D}$ };

```



```

In[ ]:= prms = {ω00 → 1, ωDD → 0.545};
ZOP1 = RegionPlot[(EV0 /. Z0 /. prms) < 0,
  {cDrive, 0, 1}, {h0D, 0, 1}, PlotRangePadding → None,
  PlotStyle → RGBColor[0, 0, 1, 0.2], BoundaryStyle → Blue];
ZOP2 = RegionPlot[Evaluate[(EVD1 /. Z0 /. prms) < 0 &&
  Evaluate[(EVD2 /. Z0 /. prms) < 0,
  {cDrive, 0, 1}, {h0D, 0, 1}, PlotRangePadding → None,
  PlotStyle → RGBColor[1, 0, 0, 0.2], BoundaryStyle → Red];
OmegaG0 = InvasionPic[ZOP1, ZOP2]
Export["../pics/invasionE_Gomega.pdf", OmegaG0]

```

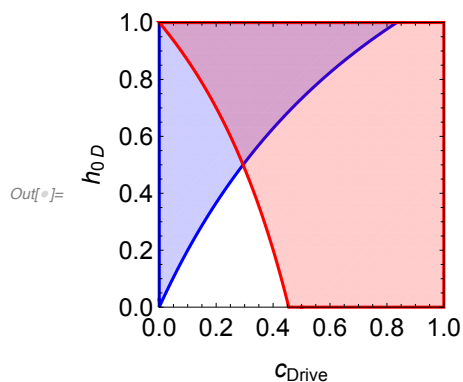

```
Out[ ]:= ../pics/invasionE_Gomega.pdf
```

**Legend :** see above (Adult death only)

Interior equilibrium for the parameters tested in R

```

In[ ]:= neqs = Flatten[Evaluate[
  {DdGNtot == 0, DdGpD == 0, DdGHW == 0} /. demog /. Z0 /. prms /. KK → 25 000 /.
  h0D → 1 /. cDrive → 0.5]];
NSolve[neqs, {Ntot, pD, dHW}, Reals]
Out[ ]:= {{dHW → 0, pD → 1., Ntot → -2522.94},
  {Ntot → 3819.56, pD → 0.308668, dHW → -0.0570609}, {dHW → 0, pD → 0, Ntot → 10 000.}}

```

## Plot the types of equilibria -- replacement drive

```

In[ ]:= EVD1 = .; EVD2 = .;
EVD1r = evDr[[3]];
EVD2r = evDr[[2]];

```

## Adult mortality only

```

In[ ]:= prms = {d00 → 0.6, dDD → 0.7};
ADOP1 = RegionPlot[Evaluate[(EV0 /. ADO /. prms)] < 0,
  {CDrive, 0, 1}, {h0D, 0, 1}, PlotRangePadding → None,
  PlotStyle → RGBColor[0, 0, 1, 0.2], BoundaryStyle → Blue];
ADOP2 = RegionPlot[Evaluate[(EVD1r /. ADO /. prms)] < 0 &&
  Evaluate[(EVD2r /. ADO /. prms)] < 0,
  {CDrive, 0, 1}, {h0D, 0, 1}, PlotRangePadding → None,
  PlotStyle → RGBColor[1, 0, 0, 0.2], BoundaryStyle → Red];
ADG0 = InvasionPic[ADOP1, ADOP2]
Export["../pics/invasionR_Gd.pdf", ADG0]

```

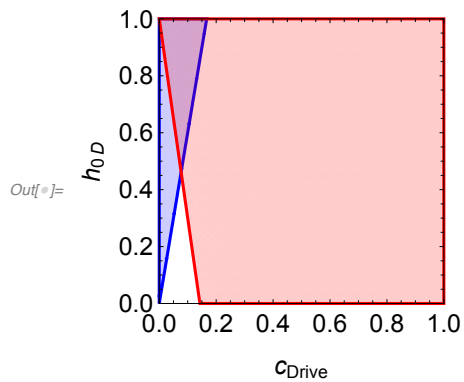

Out[ ]:= ../pics/invasionR\_Gd.pdf

## Fecundity only

```

In[ ]:= prms = { $\beta_{00} \rightarrow 1$ ,  $\beta_{DD} \rightarrow 0.93$ };
FOP1 = RegionPlot[(EV0 /. F0 /. prms) < 0,
  {CDrive, 0, 1}, {h0D, 0, 1}, PlotRangePadding → None,
  PlotStyle → RGBColor[0, 0, 1, 0.2], BoundaryStyle → Blue];
FOP2 = RegionPlot[Evaluate[(EVD1r /. F0 /. prms)] < 0 &&
  Evaluate[(EVD2r /. F0 /. prms)] < 0,
  {CDrive, 0, 1}, {h0D, 0, 1}, PlotRangePadding → None,
  PlotStyle → RGBColor[1, 0, 0, 0.2], BoundaryStyle → Red];
FG0 = InvasionPic[FOP1, FOP2]
Export["../pics/invasionR_Gbeta.pdf", FG0]

```

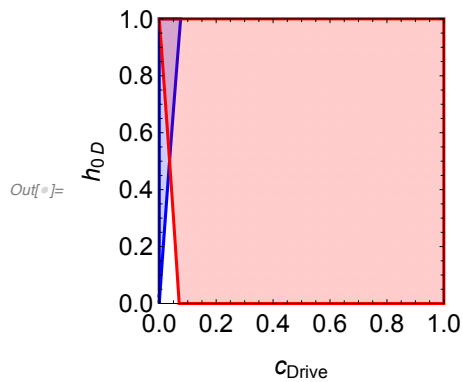

Out[ ]:= ../pics/invasionR\_Gbeta.pdf

## Zygote viability only

```

In[ ]:= prms = {ω00 → 1, ωDD → 0.86};
ZOP1 = RegionPlot[(EV0 /. ZO /. prms) < 0,
  {cDrive, 0, 1}, {h0D, 0, 1}, PlotRangePadding → None,
  PlotStyle → RGBColor[0, 0, 1, 0.2], BoundaryStyle → Blue];
ZOP2 = RegionPlot[Evaluate[(EVD1r /. ZO /. prms)] < 0 &&
  Evaluate[(EVD2r /. ZO /. prms)] < 0,
  {cDrive, 0, 1}, {h0D, 0, 1}, PlotRangePadding → None,
  PlotStyle → RGBColor[1, 0, 0, 0.2], BoundaryStyle → Red];
OmegaG0 = InvasionPic[ZOP1, ZOP2]
Export["../pics/invasionR_Gomega.pdf", OmegaG0]

```

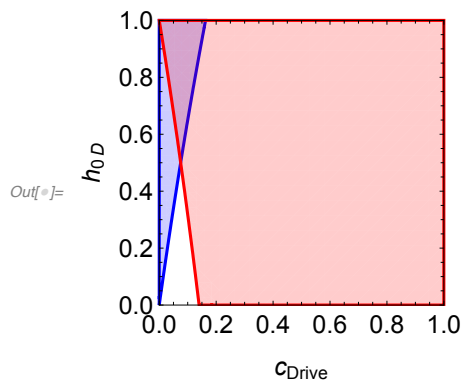

Out[ ]:= ../pics/invasionR\_Gomega.pdf

## Model with brake

### Model definition

#### Original variables

Gamete precursors - taking gene conversion into account

```

In[ ]:= scaled = Conversion.Diagonal[βG.Transpose[VG]];
% // MatrixForm

```

Out[ ]//MatrixForm=

$$\begin{pmatrix}
 n_{00} \beta_{00} & & & & \\
 n_{0D} \beta_{0D} (1 - c_{Drive}) & & & & \\
 n_{DD} \beta_{DD} + n_{0D} \beta_{0D} c_{Drive} & & & & \\
 n_{0B} \beta_{0B} & & & & \\
 n_{DB} \beta_{DB} (1 - c_{Brake}) & & & & \\
 n_{BB} \beta_{BB} + n_{DB} \beta_{DB} c_{Brake} & & & & 
 \end{pmatrix}$$

Different types of zygotes

$$\text{In[*]:= Vegg} = \left( \begin{array}{c} \{\text{scaled}\}.\text{Cross00}.\text{scaled} \\ \{\text{scaled}\}.\text{Cross0D}.\text{scaled} \\ \{\text{scaled}\}.\text{CrossDD}.\text{scaled} \\ \{\text{scaled}\}.\text{Cross0B}.\text{scaled} \\ \{\text{scaled}\}.\text{CrossDB}.\text{scaled} \\ \{\text{scaled}\}.\text{CrossBB}.\text{scaled} \end{array} \right) / (\text{Ntot})^2 // \text{FullSimplify} // \text{Flatten};$$

Vegg // MatrixForm

Out[\*]:=MatrixForm=

$$\left( \begin{array}{c} \frac{(2 n_{00} \beta_{00} + n_{0B} \beta_{0B} + n_{0D} \beta_{0D} - n_{0D} \beta_{0D} c_{Drive})^2}{4 N_{tot}^2} \\ \frac{(2 n_{00} \beta_{00} + n_{0B} \beta_{0B} + n_{0D} \beta_{0D} - n_{0D} \beta_{0D} c_{Drive}) (n_{0D} \beta_{0D} + n_{DB} \beta_{DB} + 2 n_{DD} \beta_{DD} - n_{DB} \beta_{DB} c_{Brake} + n_{0D} \beta_{0D} c_{Drive})}{2 N_{tot}^2} \\ \frac{(n_{0D} \beta_{0D} + n_{DB} \beta_{DB} + 2 n_{DD} \beta_{DD} - n_{DB} \beta_{DB} c_{Brake} + n_{0D} \beta_{0D} c_{Drive})^2}{4 N_{tot}^2} \\ \frac{(n_{0B} \beta_{0B} + 2 n_{BB} \beta_{BB} + n_{DB} \beta_{DB} + n_{DB} \beta_{DB} c_{Brake}) (2 n_{00} \beta_{00} + n_{0B} \beta_{0B} + n_{0D} \beta_{0D} - n_{0D} \beta_{0D} c_{Drive})}{2 N_{tot}^2} \\ \frac{(n_{0B} \beta_{0B} + 2 n_{BB} \beta_{BB} + n_{DB} \beta_{DB} + n_{DB} \beta_{DB} c_{Brake}) (n_{0D} \beta_{0D} + n_{DB} \beta_{DB} + 2 n_{DD} \beta_{DD} - n_{DB} \beta_{DB} c_{Brake} + n_{0D} \beta_{0D} c_{Drive})}{2 N_{tot}^2} \\ \frac{(n_{0B} \beta_{0B} + 2 n_{BB} \beta_{BB} + n_{DB} \beta_{DB} + n_{DB} \beta_{DB} c_{Brake})^2}{4 N_{tot}^2} \end{array} \right)$$

Dynamics of the different genotypes

$$\begin{aligned} \text{In[*]:= } dGn00 &= \text{Vegg}[[1]] \omega_{00} \text{Birth}[N_{tot}] - d_{00} \text{Death}[N_{tot}] n_{00} \\ dGn0D &= \text{Vegg}[[2]] \omega_{0D} \text{Birth}[N_{tot}] - d_{0D} \text{Death}[N_{tot}] n_{0D} \\ dGnDD &= \text{Vegg}[[3]] \omega_{DD} \text{Birth}[N_{tot}] - d_{DD} \text{Death}[N_{tot}] n_{DD} \\ dGn0B &= \text{Vegg}[[4]] \omega_{0B} \text{Birth}[N_{tot}] - d_{0B} \text{Death}[N_{tot}] n_{0B} \\ dGnDB &= \text{Vegg}[[5]] \omega_{DB} \text{Birth}[N_{tot}] - d_{DB} \text{Death}[N_{tot}] n_{DB} \\ dGnBB &= \text{Vegg}[[6]] \omega_{BB} \text{Birth}[N_{tot}] - d_{BB} \text{Death}[N_{tot}] n_{BB} \end{aligned}$$

$$\text{Out[*]:= } -d_{00} n_{00} \text{Death}[N_{tot}] + \frac{\omega_{00} \text{Birth}[N_{tot}] (2 n_{00} \beta_{00} + n_{0B} \beta_{0B} + n_{0D} \beta_{0D} - n_{0D} \beta_{0D} c_{Drive})^2}{4 N_{tot}^2}$$

$$\begin{aligned} \text{Out[*]:= } &-d_{0D} n_{0D} \text{Death}[N_{tot}] + \\ &\frac{1}{2 N_{tot}^2} \omega_{0D} \text{Birth}[N_{tot}] (2 n_{00} \beta_{00} + n_{0B} \beta_{0B} + n_{0D} \beta_{0D} - n_{0D} \beta_{0D} c_{Drive}) \\ &\quad (n_{0D} \beta_{0D} + n_{DB} \beta_{DB} + 2 n_{DD} \beta_{DD} - n_{DB} \beta_{DB} c_{Brake} + n_{0D} \beta_{0D} c_{Drive}) \end{aligned}$$

$$\begin{aligned} \text{Out[*]:= } &-d_{DD} n_{DD} \text{Death}[N_{tot}] + \\ &\frac{\omega_{DD} \text{Birth}[N_{tot}] (n_{0D} \beta_{0D} + n_{DB} \beta_{DB} + 2 n_{DD} \beta_{DD} - n_{DB} \beta_{DB} c_{Brake} + n_{0D} \beta_{0D} c_{Drive})^2}{4 N_{tot}^2} \end{aligned}$$

$$\begin{aligned} \text{Out[*]:= } &-d_{0B} n_{0B} \text{Death}[N_{tot}] + \\ &\frac{1}{2 N_{tot}^2} \omega_{0B} \text{Birth}[N_{tot}] (n_{0B} \beta_{0B} + 2 n_{BB} \beta_{BB} + n_{DB} \beta_{DB} + n_{DB} \beta_{DB} c_{Brake}) \\ &\quad (2 n_{00} \beta_{00} + n_{0B} \beta_{0B} + n_{0D} \beta_{0D} - n_{0D} \beta_{0D} c_{Drive}) \end{aligned}$$

$$\begin{aligned} \text{Out[*]:= } &-d_{DB} n_{DB} \text{Death}[N_{tot}] + \\ &\frac{1}{2 N_{tot}^2} \omega_{DB} \text{Birth}[N_{tot}] (n_{0B} \beta_{0B} + 2 n_{BB} \beta_{BB} + n_{DB} \beta_{DB} + n_{DB} \beta_{DB} c_{Brake}) \\ &\quad (n_{0D} \beta_{0D} + n_{DB} \beta_{DB} + 2 n_{DD} \beta_{DD} - n_{DB} \beta_{DB} c_{Brake} + n_{0D} \beta_{0D} c_{Drive}) \end{aligned}$$

$$\text{Out[*]:= } -d_{BB} n_{BB} \text{Death}[N_{tot}] + \frac{\omega_{BB} \text{Birth}[N_{tot}] (n_{0B} \beta_{0B} + 2 n_{BB} \beta_{BB} + n_{DB} \beta_{DB} + n_{DB} \beta_{DB} c_{Brake})^2}{4 N_{tot}^2}$$

Export for C

In[ ]:= dGn00 /. chgvar // CForm

Out[ ]//CForm=  $-(d00 \cdot \text{pop}(0)) + (\omega_{00} \cdot (1 - \text{popsize}/K) \cdot \text{Power}(2 \cdot \beta_{00} \cdot \text{pop}(0) + \beta_{0D} \cdot \text{pop}(1))$

In[ ]:= dGn0D /. chgvar // CForm

Out[ ]//CForm=  $-(d0D \cdot \text{pop}(1)) + (\omega_{0D} \cdot (1 - \text{popsize}/K) \cdot (2 \cdot \beta_{00} \cdot \text{pop}(0) + \beta_{0D} \cdot \text{pop}(1) - \beta_{0D} \cdot \text{conversionD} \cdot \text{pop}(1) + \beta_{0D} \cdot \text{conversionD} \cdot \text{pop}(1) + 2 \cdot \beta_{DD} \cdot \text{pop}(2) + \beta_{DB} \cdot \text{pop}(3))$

In[ ]:= dGnDD /. chgvar // CForm

Out[ ]//CForm=  $-(dDD \cdot \text{pop}(2)) + (\omega_{DD} \cdot (1 - \text{popsize}/K) \cdot \text{Power}(\beta_{0D} \cdot \text{pop}(1) + \beta_{0D} \cdot \text{conversionD} \cdot \text{pop}(1) + \beta_{DD} \cdot \text{pop}(2) + \beta_{DB} \cdot \text{pop}(3))$

In[ ]:= dGn0B /. chgvar // CForm

Out[ ]//CForm=  $-(d0B \cdot \text{pop}(3)) + (\omega_{0B} \cdot (1 - \text{popsize}/K) \cdot (2 \cdot \beta_{00} \cdot \text{pop}(0) + \beta_{0D} \cdot \text{pop}(1) - \beta_{0B} \cdot \text{pop}(3) + \beta_{0B} \cdot \text{conversionB} \cdot \text{pop}(3) + \beta_{DB} \cdot \text{pop}(4) + \beta_{DB} \cdot \text{conversionB} \cdot \text{pop}(4) + 2 \cdot \beta_{BB} \cdot \text{pop}(5))$

In[ ]:= dGnDB /. chgvar // CForm

Out[ ]//CForm=  $-(dDB \cdot \text{pop}(4)) + (\omega_{DB} \cdot (1 - \text{popsize}/K) \cdot (\beta_{0D} \cdot \text{pop}(1) + \beta_{0D} \cdot \text{conversionD} \cdot \text{pop}(1) + \beta_{0B} \cdot \text{pop}(3) + \beta_{DB} \cdot \text{pop}(4) + \beta_{DB} \cdot \text{conversionB} \cdot \text{pop}(4) + 2 \cdot \beta_{BB} \cdot \text{pop}(5))$

In[ ]:= dGnBB /. chgvar // CForm

Out[ ]//CForm=  $-(dBB \cdot \text{pop}(5)) + (\omega_{BB} \cdot (1 - \text{popsize}/K) \cdot \text{Power}(\beta_{0B} \cdot \text{pop}(3) + \beta_{DB} \cdot \text{pop}(4) + \beta_{BB} \cdot \text{pop}(5))$

Abundance of the alleles (/2)

In[ ]:= dGn0 = dGn00 + 1/2 dGn0D + 1/2 dGn0B // FullSimplify;

dGnD = dGnDD + 1/2 dGn0D + 1/2 dGnDB // FullSimplify;

dGnB = dGnBB + 1/2 dGn0B + 1/2 dGnDB // FullSimplify;

## Changing the variables

In[ ]:= dGntot = dGn0 + dGnD + dGnB /. solCV3;

In[ ]:= dGpD =  $\frac{dGnD}{N_{tot}} - \frac{(n_{DD} + 1/2 n_{0D} + 1/2 n_{0B}) dGntot}{N_{tot}^2}$  /. solCV3;

dGpB =  $\frac{dGnB}{N_{tot}} - \frac{(n_{BB} + 1/2 n_{0B} + 1/2 n_{DB}) dGntot}{N_{tot}^2}$  /. solCV3;

In[ ]:= dGHW0D =  $\frac{-n_{0D} dGntot + N_{tot} (dGn0D + 2 N_{tot} (p_D dGpB + (-1 + p_B + 2 p_D) dGpD))}{N_{tot}^2}$  /. solCV3;

dGHWDB =  $\frac{N_{tot} dGnDB - n_{DB} dGntot}{N_{tot}^2} - 2 (p_D dGpB + p_B dGpD)$  /. solCV3;

dGHW0B =  $\frac{-n_{0B} dGntot + N_{tot} (dGn0B + 2 N_{tot} (p_B dGpD + (-1 + p_D + 2 p_B) dGpB))}{N_{tot}^2}$  /. solCV3;

## Invasion conditions

### Stability of the WT only equilibrium

Jacobian matrix

In[ ]:= JacG =

$$\begin{pmatrix} D[dGNtot, Ntot] & D[dGNtot, pD] & D[dGNtot, pB] & D[dGNtot, diffHW0D] & D[dGNtot, diffH \\ D[dGpD, Ntot] & D[dGpD, pD] & D[dGpD, pB] & D[dGpD, diffHW0D] & D[dGpD, diffH \\ D[dGpB, Ntot] & D[dGpB, pD] & D[dGpB, pB] & D[dGpB, diffHW0D] & D[dGpB, diffH \\ D[dGHW0D, Ntot] & D[dGHW0D, pD] & D[dGHW0D, pB] & D[dGHW0D, diffHW0D] & D[dGHW0D, diffH \\ D[dGHW0B, Ntot] & D[dGHW0B, pD] & D[dGHW0B, pB] & D[dGHW0B, diffHW0D] & D[dGHW0B, diffH \\ D[dGHWDB, Ntot] & D[dGHWDB, pD] & D[dGHWDB, pB] & D[dGHWDB, diffHW0D] & D[dGHWDB, diffH \end{pmatrix}$$

Out[ ]:=

$$\begin{aligned} & \left\{ \left\{ \dots 1 \dots \right\}, \dots 4 \dots, \left\{ -\frac{2 \left( \dots 1 \dots \right)}{Ntot^3} + \frac{\dots 1 \dots}{Ntot^2} - \right. \right. \\ & 2 \left( pD \left( -\frac{1}{4 Ntot^2} \left( -2 \left( -dBB Ntot \left( diffHW0B + diffHWDB - 2 pB^2 \right) + dDB Ntot \right. \right. \right. \right. \\ & \left. \left. \left( diffHWDB + 2 pB pD \right) + d0B Ntot \left( diffHW0B - 2 pB \left( -1 + pB + pD \right) \right) \right) \right. \\ & \left. \left. Death[Ntot] + \frac{Birth[Ntot] \left( \dots 1 \dots \right) \left( -Ntot \left( \dots 1 \dots \right) \beta00 \omega0B + \dots 11 \dots + \dots 1 \dots \right)}{Ntot^2} \right) - \right. \\ & \left. \frac{\left( \frac{1}{2} \left( -diffHW0B - diffHWDB + 2 pB^2 \right) + \frac{1}{2} \left( \dots 1 \dots \right) + \frac{1}{2} \left( diffHW0B - \dots 1 \dots \right) \right) \left( \dots 1 \dots \right)}{Ntot^2} + \right. \\ & \left. \frac{2 \left( \dots 1 \dots \right) \left( \dots 1 \dots \right)}{Ntot^3} + \frac{-2 \left( \dots 1 \dots \right) Death[Ntot] + \dots 7 \dots}{4 Ntot} - \right. \\ & \frac{1}{Ntot^2} \left( -\frac{1}{2} Ntot \left( diffHW0B + diffHWDB - 2 pB^2 \right) + \right. \\ & \left. \frac{1}{2} Ntot \left( diffHWDB + 2 pB pD \right) + \frac{1}{2} Ntot \left( diffHW0B - 2 pB \left( -1 + pB + pD \right) \right) \right) \\ & \left( - \left( d0D \left( diffHW0D - \dots 1 \dots \right) - \dots 1 \dots \right) \dots 1 \dots + \right. \\ & \left. \dots 8 \dots + \dots 1 \dots \right) \left. \right) + \\ & pB \left( \dots 1 \dots \right) \left. \right\}, \dots 4 \dots, \left\{ \frac{\dots 1 \dots}{Ntot^2} - 2 \dots 1 \dots \right\} \} \end{aligned}$$

large output

show less

show more

show all

set size limit...

Jacobian matrix, specifying the demographic functions

In[ ]:= JacGdemog =

$$\begin{pmatrix} D[dGNtot /. demog, Ntot] & D[dGNtot /. demog, pD] & D[dGNtot /. demog, pB] & D[dGNtot / \\ D[dGpD /. demog, Ntot] & D[dGpD /. demog, pD] & D[dGpD /. demog, pB] & D[dGpD / \\ D[dGpB /. demog, Ntot] & D[dGpB /. demog, pD] & D[dGpB /. demog, pB] & D[dGpB / \\ D[dGHW0D /. demog, Ntot] & D[dGHW0D /. demog, pD] & D[dGHW0D /. demog, pB] & D[dGHW0D / \\ D[dGHW0B /. demog, Ntot] & D[dGHW0B /. demog, pD] & D[dGHW0B /. demog, pB] & D[dGHW0B / \\ D[dGHWDB /. demog, Ntot] & D[dGHWDB /. demog, pD] & D[dGHWDB /. demog, pB] & D[dGHWDB / \end{pmatrix};$$

WT-only stability

```
In[*]:= evGWT =
  Eigenvalues[AF[JacG /. {pD -> 0, pB -> 0, diffHW0B -> 0, diffHW0D -> 0, diffHWDB -> 0} /.
    demog /. sol0]] // AF
Out[*]:= {-dBB, -dDB, -dDD, d00 - beta00^2 omega00,
  -d0B + (d00 beta0B omega0B) / (beta00 omega00), (d00 beta00 omega00 + d00 beta0D omega0D + d00 beta0D omega0D cDrive) / (beta00 omega00)}
```

Comparison to the value that was previously found -> same

```
In[*]:= evGWT[[6]] - EV0 // AF
Out[*]:= 0
```

# Conversion in the zygote

## Model with WT and Drive

### Model definition

#### Original variables

Matrices of crosses in the reduced model

```
In[*]:= DCross00 =  $\begin{pmatrix} 1 & 1/2 & 0 \\ 1/2 & 1/4 & 0 \\ 0 & 0 & 0 \end{pmatrix};$ 
In[*]:= DCross0D =  $\begin{pmatrix} 0 & 1/2 & 1 \\ 1/2 & 1/2 & 1/2 \\ 1 & 1/2 & 0 \end{pmatrix};$ 
In[*]:= DCrossDD =  $\begin{pmatrix} 0 & 0 & 0 \\ 0 & 1/4 & 1/2 \\ 0 & 1/2 & 1 \end{pmatrix};$ 
```

Vector of genotypes

```
In[*]:= DV_G =  $\begin{pmatrix} n00 \\ n0D \\ nDD \end{pmatrix};$ 
```

Vector of fecundities

```
In[*]:= Dbeta_G =  $\begin{pmatrix} beta00 \\ beta0D \\ betaDD \end{pmatrix};$ 
```

Genotypes scaled by their fecundities



```
In[*]:= DZscaled = Diagonal[DβG.Transpose[DVG]];
% // MatrixForm
```

```
Out[*]//MatrixForm=
```

$$\begin{pmatrix} n_{00} \beta_{00} & n_{0D} \beta_{0D} & n_{DD} \beta_{DD} \end{pmatrix}$$

Frequencies of the different types of zygotes (pre gene conversion)

```
In[*]:= DVegg = ( {DZscaled}.DCross00.DZscaled
{DZscaled}.DCross0D.DZscaled
{DZscaled}.DCrossDD.DZscaled ) / (Ntot)2 // FullSimplify
```

$$\text{Out[*]} = \left\{ \left\{ \frac{(2 n_{00} \beta_{00} + n_{0D} \beta_{0D})^2}{4 N_{\text{tot}}^2} \right\}, \right. \\ \left. \left\{ \frac{(2 n_{00} \beta_{00} + n_{0D} \beta_{0D}) (n_{0D} \beta_{0D} + 2 n_{DD} \beta_{DD})}{2 N_{\text{tot}}^2} \right\}, \left\{ \frac{(n_{0D} \beta_{0D} + 2 n_{DD} \beta_{DD})^2}{4 N_{\text{tot}}^2} \right\} \right\}$$

Matrix of gene conversion

```
In[*]:= DMConversion =  $\begin{pmatrix} 1 & 0 & 0 \\ 0 & 1 - c_{\text{Drive}} & 0 \\ 0 & c_{\text{Drive}} & 1 \end{pmatrix}$ ;
```

Frequencies of the zygotes, post gene conversion

```
In[*]:= DNVG = DMConversion.DVegg // Flatten
```

$$\text{Out[*]} = \left\{ \frac{(2 n_{00} \beta_{00} + n_{0D} \beta_{0D})^2}{4 N_{\text{tot}}^2}, \frac{(2 n_{00} \beta_{00} + n_{0D} \beta_{0D}) (n_{0D} \beta_{0D} + 2 n_{DD} \beta_{DD}) (1 - c_{\text{Drive}})}{2 N_{\text{tot}}^2}, \right. \\ \left. \frac{(n_{0D} \beta_{0D} + 2 n_{DD} \beta_{DD})^2}{4 N_{\text{tot}}^2} + \frac{(2 n_{00} \beta_{00} + n_{0D} \beta_{0D}) (n_{0D} \beta_{0D} + 2 n_{DD} \beta_{DD}) c_{\text{Drive}}}{2 N_{\text{tot}}^2} \right\}$$

Dynamics of the different types of genotypes

```
In[*]:= DdZn00 = DNVG[[1]] ω00 Birth[Ntot] - d00 Death[Ntot] n00
DdZn0D = DNVG[[2]] ω0D Birth[Ntot] - d0D Death[Ntot] n0D
DdZnDD = DNVG[[3]] ωDD Birth[Ntot] - dDD Death[Ntot] nDD
```

$$\text{Out[*]} = \frac{(2 n_{00} \beta_{00} + n_{0D} \beta_{0D})^2 \omega_{00} \text{Birth}[N_{\text{tot}}]}{4 N_{\text{tot}}^2} - d_{00} n_{00} \text{Death}[N_{\text{tot}}]$$

$$\text{Out[*]} = -d_{0D} n_{0D} \text{Death}[N_{\text{tot}}] + \frac{(2 n_{00} \beta_{00} + n_{0D} \beta_{0D}) (n_{0D} \beta_{0D} + 2 n_{DD} \beta_{DD}) \omega_{0D} \text{Birth}[N_{\text{tot}}] (1 - c_{\text{Drive}})}{2 N_{\text{tot}}^2}$$

$$\text{Out[*]} = -d_{DD} n_{DD} \text{Death}[N_{\text{tot}}] + \omega_{DD} \text{Birth}[N_{\text{tot}}] \left( \frac{(n_{0D} \beta_{0D} + 2 n_{DD} \beta_{DD})^2}{4 N_{\text{tot}}^2} + \frac{(2 n_{00} \beta_{00} + n_{0D} \beta_{0D}) (n_{0D} \beta_{0D} + 2 n_{DD} \beta_{DD}) c_{\text{Drive}}}{2 N_{\text{tot}}^2} \right)$$

With other variables

Allelic densities

In[\*]:= **DdZn0 = DdZn00 + 1 / 2 DdZn0D /. solCV2;**

**DdZnD = DdZnDD + 1 / 2 DdZn0D /. solCV2 // FullSimplify**

$$\text{Out[*]} = \frac{1}{4} \left( -2 \text{Ntot} \left( (d0D - dDD) dHW + 2 d0D pD + 2 (-d0D + dDD) pD^2 \right) \text{Death}[\text{Ntot}] + \right. \\ \left. (dHW (\beta0D - \beta DD) + 2 pD (\beta0D - pD \beta0D + pD \beta DD)) \text{Birth}[\text{Ntot}] \right. \\ \left. - \left( dHW - 2 (-1 + pD)^2 \right) \beta00 \omega0D + (dHW - 2 (-1 + pD) pD) \beta0D \omega0D + \right. \\ \left. dHW (\beta0D - \beta DD) \omega DD + 2 pD (\beta0D - pD \beta0D + pD \beta DD) \omega DD + \right. \\ \left. \left( (dHW - 2 (-1 + pD)^2) \beta00 - dHW \beta0D + 2 (-1 + pD) pD \beta0D \right) (\omega0D - 2 \omega DD) c_{\text{Drive}} \right)$$

Total population size

In[\*]:= **DdZNtot = DdZn0 + DdZnD;**

Proportion of drive

In[\*]:= **DdZpD =  $\frac{\text{DdZnD}}{\text{Ntot}} - pD \frac{\text{DdZNtot}}{\text{Ntot}}$  // FullSimplify**

$$\text{Out[*]} = \frac{1}{4 \text{Ntot}} \left( -2 \text{Ntot} \left( (d0D - dDD) dHW + 2 d0D pD + 2 (-d0D + dDD) pD^2 \right) \text{Death}[\text{Ntot}] + \right. \\ \left. (dHW (\beta0D - \beta DD) + 2 pD (\beta0D - pD \beta0D + pD \beta DD)) \text{Birth}[\text{Ntot}] \right. \\ \left. - \left( dHW - 2 (-1 + pD)^2 \right) \beta00 \omega0D + (dHW - 2 (-1 + pD) pD) \beta0D \omega0D + \right. \\ \left. dHW (\beta0D - \beta DD) \omega DD + 2 pD (\beta0D - pD \beta0D + pD \beta DD) \omega DD + \right. \\ \left. \left( (dHW - 2 (-1 + pD)^2) \beta00 - dHW \beta0D + 2 (-1 + pD) pD \beta0D \right) (\omega0D - 2 \omega DD) c_{\text{Drive}} \right) + \\ pD \left( -2 \text{Ntot} \left( -2 d0D dHW + d00 (dHW - 2 (-1 + pD)^2) + 4 d0D (-1 + pD) pD + \right. \right. \\ \left. \left. dDD (dHW - 2 pD^2) \right) \text{Death}[\text{Ntot}] - \right. \\ \left. \text{Birth}[\text{Ntot}] \left( \left( (dHW - 2 (-1 + pD)^2) \beta00 - dHW \beta0D + 2 (-1 + pD) pD \beta0D \right) \right. \right. \\ \left. \left( (dHW - 2 (-1 + pD)^2) \beta00 - dHW \beta0D + 2 (-1 + pD) pD \beta0D \right) \omega00 - \right. \\ \left. 2 (dHW (\beta0D - \beta DD) + 2 pD (\beta0D - pD \beta0D + pD \beta DD)) \omega0D \right) + \\ \left. (dHW (\beta0D - \beta DD) + 2 pD (\beta0D - pD \beta0D + pD \beta DD))^2 \omega DD + \right. \\ \left. 2 \left( (dHW - 2 (-1 + pD)^2) \beta00 - dHW \beta0D + 2 (-1 + pD) pD \beta0D \right) \right. \\ \left. (dHW (\beta0D - \beta DD) + 2 pD (\beta0D - pD \beta0D + pD \beta DD)) (\omega0D - \omega DD) c_{\text{Drive}} \right) \right)$$

Deviation from Hardy - Weinberg

In[\*]:= **DdZHW =  $\frac{-n0D \text{DdZNtot} + \text{Ntot} (\text{DdZn0D} + 2 \text{Ntot} (-1 + 2 pD) \text{DdZpD})}{\text{Ntot}^2}$  /. solCV2**

$$\begin{aligned}
Out[*] = & \frac{1}{N_{tot}^2} \left( -N_{tot} (dHW - 2 (-1 + pD) pD) \right. \\
& \left( \frac{(-N_{tot} (dHW - 2 (-1 + pD)^2) \beta_{00} + N_{tot} (dHW - 2 (-1 + pD) pD) \beta_{0D})^2 \omega_{00} Birth[N_{tot}]}{4 N_{tot}^2} + \right. \\
& \frac{1}{2} d_{00} N_{tot} (dHW - 2 (-1 + pD)^2) Death[N_{tot}] + \\
& \frac{1}{2} \left( -d_{0D} N_{tot} (dHW - 2 (-1 + pD) pD) Death[N_{tot}] + \right. \\
& \frac{1}{2 N_{tot}^2} \left( -N_{tot} (dHW - 2 (-1 + pD)^2) \beta_{00} + N_{tot} (dHW - 2 (-1 + pD) pD) \beta_{0D} \right) \\
& \left( N_{tot} (dHW - 2 (-1 + pD) pD) \beta_{0D} + 2 \left( -\frac{dHW N_{tot}}{2} + N_{tot} pD^2 \right) \beta_{DD} \right) \\
& \left. \omega_{0D} Birth[N_{tot}] (1 - c_{Drive}) \right) + \\
& \frac{1}{4} \left( -2 N_{tot} ((d_{0D} - d_{DD}) dHW + 2 d_{0D} pD + 2 (-d_{0D} + d_{DD}) pD^2) Death[N_{tot}] + \right. \\
& (dHW (\beta_{0D} - \beta_{DD}) + 2 pD (\beta_{0D} - pD \beta_{0D} + pD \beta_{DD})) Birth[N_{tot}] \\
& \left( - (dHW - 2 (-1 + pD)^2) \beta_{00} \omega_{0D} + (dHW - 2 (-1 + pD) pD) \beta_{0D} \omega_{0D} + \right. \\
& dHW (\beta_{0D} - \beta_{DD}) \omega_{DD} + 2 pD (\beta_{0D} - pD \beta_{0D} + pD \beta_{DD}) \omega_{DD} + \left( (dHW - 2 (-1 + pD)^2) \right. \\
& \left. \beta_{00} - dHW \beta_{0D} + 2 (-1 + pD) pD \beta_{0D} \right) (\omega_{0D} - 2 \omega_{DD}) c_{Drive} \left. \right) + \\
& N_{tot} \left( -d_{0D} N_{tot} (dHW - 2 (-1 + pD) pD) Death[N_{tot}] + \frac{1}{2 N_{tot}^2} \right. \\
& (-N_{tot} (dHW - 2 (-1 + pD)^2) \beta_{00} + N_{tot} (dHW - 2 (-1 + pD) pD) \beta_{0D}) \\
& \left( N_{tot} (dHW - 2 (-1 + pD) pD) \beta_{0D} + 2 \left( -\frac{dHW N_{tot}}{2} + N_{tot} pD^2 \right) \beta_{DD} \right) \\
& \omega_{0D} Birth[N_{tot}] (1 - c_{Drive}) + \frac{1}{2} (-1 + 2 pD) \\
& (-2 N_{tot} ((d_{0D} - d_{DD}) dHW + 2 d_{0D} pD + 2 (-d_{0D} + d_{DD}) pD^2) Death[N_{tot}] + \\
& (dHW (\beta_{0D} - \beta_{DD}) + 2 pD (\beta_{0D} - pD \beta_{0D} + pD \beta_{DD})) Birth[N_{tot}] \\
& \left( - (dHW - 2 (-1 + pD)^2) \beta_{00} \omega_{0D} + (dHW - 2 (-1 + pD) pD) \beta_{0D} \omega_{0D} + \right. \\
& dHW (\beta_{0D} - \beta_{DD}) \omega_{DD} + 2 pD (\beta_{0D} - pD \beta_{0D} + pD \beta_{DD}) \omega_{DD} + \left( (dHW - 2 (-1 + pD)^2) \right. \\
& \left. \beta_{00} - dHW \beta_{0D} + 2 (-1 + pD) pD \beta_{0D} \right) (\omega_{0D} - 2 \omega_{DD}) c_{Drive} \left. \right) + \\
& pD (-2 N_{tot} (-2 d_{0D} dHW + d_{00} (dHW - 2 (-1 + pD)^2) + 4 d_{0D} (-1 + pD) \\
& pD + d_{DD} (dHW - 2 pD^2)) Death[N_{tot}] - \\
& Birth[N_{tot}] \left( \left( (dHW - 2 (-1 + pD)^2) \beta_{00} - dHW \beta_{0D} + 2 (-1 + pD) pD \beta_{0D} \right) \right. \\
& \left( \left( (dHW - 2 (-1 + pD)^2) \beta_{00} - dHW \beta_{0D} + 2 (-1 + pD) pD \beta_{0D} \right) \omega_{00} - \right. \\
& 2 (dHW (\beta_{0D} - \beta_{DD}) + 2 pD (\beta_{0D} - pD \beta_{0D} + pD \beta_{DD})) \omega_{0D} \left. \right) + \\
& (dHW (\beta_{0D} - \beta_{DD}) + 2 pD (\beta_{0D} - pD \beta_{0D} + pD \beta_{DD}))^2 \omega_{DD} + 2 \\
& \left( (dHW - 2 (-1 + pD)^2) \beta_{00} - dHW \beta_{0D} + 2 (-1 + pD) pD \beta_{0D} \right) \\
& \left. \left. \left. (dHW (\beta_{0D} - \beta_{DD}) + 2 pD (\beta_{0D} - pD \beta_{0D} + pD \beta_{DD})) (\omega_{0D} - \omega_{DD}) c_{Drive} \right) \right) \right) \left. \right)
\end{aligned}$$

## Stability of the equilibria

### Jacobian matrix

$$\text{In[*]:= Jac2} = \begin{pmatrix} D[DdZNtot, Ntot] & D[DdZNtot, pD] & D[DdZHW, dHW] \\ D[DdZpD, Ntot] & D[DdZpD, pD] & D[DdZpD, dHW] \\ D[DdZHW, Ntot] & D[DdZHW, pD] & D[DdZHW, dHW] \end{pmatrix};$$

### Stability of the WT only equilibrium

Generic version without specifying the demographic function

```
In[*]:= Jac2 /. {pD -> 0, dHW -> 0, Birth[Ntot] -> d00 Death[Ntot] Ntot / beta0^2} // FullSimplify;
ev2invD = Eigenvalues[%] // FullSimplify
```

$$\text{Out[*]:= } \left\{ -\frac{1}{2 \beta_{00}^5} \left( \beta_{00}^4 \text{Death}[N_{\text{tot}}] \right. \right. \\ \left. \left( \beta_{00} \left( d_{0D} + d_{DD} + 2 d_{00} (-1 + \omega_{00}) \right) - d_{00} \beta_{0D} \omega_{0D} + d_{00} \left( \beta_{0D} \omega_{0D} - 2 \beta_{DD} \omega_{DD} \right) c_{\text{Drive}} \right) + \right. \\ \left. \sqrt{\left( \beta_{00}^8 \text{Death}[N_{\text{tot}}]^2 \left( (-d_{0D} \beta_{00} + d_{DD} \beta_{00} + d_{00} \beta_{0D} \omega_{0D})^2 + \right. \right. \right. \\ \left. \left. d_{00} c_{\text{Drive}} \left( -2 \beta_{0D} \omega_{0D} (-d_{0D} \beta_{00} + d_{DD} \beta_{00} + d_{00} \beta_{0D} \omega_{0D}) + 4 \beta_{DD} (d_{0D} \beta_{00} - \right. \right. \right. \\ \left. \left. \left. d_{DD} \beta_{00} + d_{00} \beta_{0D} \omega_{0D} \right) \omega_{DD} + d_{00} \left( \beta_{0D} \omega_{0D} - 2 \beta_{DD} \omega_{DD} \right)^2 c_{\text{Drive}} \right) \right) \right) \right\}, \\ \frac{1}{2 \beta_{00}^5} \left( -\beta_{00}^4 \text{Death}[N_{\text{tot}}] \left( \beta_{00} \left( d_{0D} + d_{DD} + 2 d_{00} (-1 + \omega_{00}) \right) - d_{00} \beta_{0D} \omega_{0D} + \right. \right. \\ \left. \left. d_{00} \left( \beta_{0D} \omega_{0D} - 2 \beta_{DD} \omega_{DD} \right) c_{\text{Drive}} \right) + \right. \\ \left. \sqrt{\left( \beta_{00}^8 \text{Death}[N_{\text{tot}}]^2 \left( (-d_{0D} \beta_{00} + d_{DD} \beta_{00} + d_{00} \beta_{0D} \omega_{0D})^2 + \right. \right. \right. \\ \left. \left. d_{00} c_{\text{Drive}} \left( -2 \beta_{0D} \omega_{0D} (-d_{0D} \beta_{00} + d_{DD} \beta_{00} + d_{00} \beta_{0D} \omega_{0D}) + 4 \beta_{DD} (d_{0D} \beta_{00} - \right. \right. \right. \\ \left. \left. \left. \beta_{00} + d_{00} \beta_{0D} \omega_{0D} \right) \omega_{DD} + d_{00} \left( \beta_{0D} \omega_{0D} - 2 \beta_{DD} \omega_{DD} \right)^2 c_{\text{Drive}} \right) \right) \right) \right) \right\}, \\ \beta_{00}^2 \omega_{00} \text{Birth}'[N_{\text{tot}}] - d_{00} \left( \text{Death}[N_{\text{tot}}] + N_{\text{tot}} \text{Death}'[N_{\text{tot}}] \right) \}$$

```
In[*]:= evZ0 = Eigenvalues[Jac2 /. demog /. {pD -> 0, dHW -> 0} /. sol0 // Simplify] // AF
```

$$\text{Out[*]:= } \left\{ d_{00} - \beta_{00}^2 \omega_{00}, \right. \\ \left. -\frac{1}{2 \beta_{00} \omega_{00}} \left( d_{0D} \beta_{00} \omega_{00} + d_{DD} \beta_{00} \omega_{00} - d_{00} \beta_{0D} \omega_{0D} + d_{00} \beta_{0D} \omega_{0D} c_{\text{Drive}} - 2 d_{00} \beta_{DD} \omega_{DD} \right. \right. \\ \left. \left. c_{\text{Drive}} + \sqrt{\left( \left( (d_{0D} + d_{DD}) \beta_{00} \omega_{00} - d_{00} \beta_{0D} \omega_{0D} + d_{00} \left( \beta_{0D} \omega_{0D} - 2 \beta_{DD} \omega_{DD} \right) c_{\text{Drive}} \right)^2 + \right. \right. \right. \\ \left. \left. 4 \beta_{00} \omega_{00} \left( -d_{0D} d_{DD} \beta_{00} \omega_{00} + d_{00} d_{DD} \beta_{0D} \omega_{0D} + \right. \right. \right. \\ \left. \left. \left. d_{00} \left( -d_{DD} \beta_{0D} \omega_{0D} + 2 d_{0D} \beta_{DD} \omega_{DD} \right) c_{\text{Drive}} \right) \right) \right) \right\}, \\ \frac{1}{2 \beta_{00} \omega_{00}} \left( -d_{0D} \beta_{00} \omega_{00} - d_{DD} \beta_{00} \omega_{00} + d_{00} \beta_{0D} \omega_{0D} - d_{00} \beta_{0D} \omega_{0D} c_{\text{Drive}} + \right. \\ \left. 2 d_{00} \beta_{DD} \omega_{DD} c_{\text{Drive}} + \right. \\ \left. \sqrt{\left( \left( (d_{0D} + d_{DD}) \beta_{00} \omega_{00} - d_{00} \beta_{0D} \omega_{0D} + d_{00} \left( \beta_{0D} \omega_{0D} - 2 \beta_{DD} \omega_{DD} \right) c_{\text{Drive}} \right)^2 + \right. \right. \right. \\ \left. \left. 4 \beta_{00} \omega_{00} \left( -d_{0D} d_{DD} \beta_{00} \omega_{00} + d_{00} d_{DD} \beta_{0D} \omega_{0D} + \right. \right. \right. \\ \left. \left. \left. d_{00} \left( -d_{DD} \beta_{0D} \omega_{0D} + 2 d_{0D} \beta_{DD} \omega_{DD} \right) c_{\text{Drive}} \right) \right) \right) \right\}$$

Export

```

In[ ]:= evZ0[[3]] /. chgvar // CForm
Out[ ]//CForm= -(beta00*d0D*omega00) - beta00*dDD*omega00 + beta0D*d00*omega0D - beta0D*conversionD*
Sqrt(Power(beta00*(d0D + dDD)*omega00 - beta0D*d00*omega0D + conversionD*
4*beta00*omega00*(-(beta00*d0D*dDD*omega00) + beta0D*d00*dDD*omega0D + (
(2.*beta00*omega00)

```

## Stability of the drive only equilibrium -- eradication drive

```

In[ ]:= evZD = Eigenvalues[Limit[Jac2 /. demog, {pD → 1, dHW → 0, Ntot → 0}]] // AF

```

```

Out[ ]:= {-dDD + βDD² ωDD, -d00 + dDD - βDD² ωDD,
-d0D + dDD + β0D βDD ω0D - βDD² ωDD - β0D βDD ω0D cDrive}

```

Export

```

In[ ]:= evZD[[2]] /. chgvar // CForm

```

```

Out[ ]//CForm= -d00 + dDD - Power(betaDD,2)*omegaDD

```

```

In[ ]:= evZD[[3]] /. chgvar // CForm

```

```

Out[ ]//CForm= -d0D + dDD + beta0D*betaDD*omega0D - beta0D*betaDD*conversionD*omega0D - Power

```

## Stability of the drive only equilibrium -- replacement drive

```

In[ ]:= solZDonly = Solve[(DdZNtot /. demog /. pD → 1 /. dHW → 0) == 0, Ntot]

```

```

Out[ ]:= {{Ntot → 0}, {Ntot → -dDD KK + KK βDD² ωDD / βDD² ωDD}}

```

```

In[ ]:= evZDr = Eigenvalues[
Limit[Jac2 /. demog, {pD → 1, dHW → 0, Ntot → (Ntot /. solZDonly[[2]])}] // AF

```

```

Out[ ]:= {-d00, dDD - βDD² ωDD, (dDD β0D ω0D - d0D βDD ωDD - dDD β0D ω0D cDrive) / βDD ωDD}

```

## Plot the types of equilibria -- eradication drive

Rename the key eigenvalues

```

In[ ]:= EV0 = evZ0[[3]];

```

```

In[ ]:= EVD1 = evZD[[3]];

```

```

EVD2 = evZD[[2]];

```

## Adult death only

Here we assume that the effect of the drive (/brake) is only on adult mortality; all other parameters are the same as WT individuals

```

In[ ]:= ADO =
{ω00 → 1, ω0D → 1, ωDD → 1, β00 → 1, β0D → 1, βDD → 1, d0D → d00 (1 - h0D) + dDD h0D};

```

```

In[ ]:= prms = {d00 → 0.6, dDD → 1.1};
sol0 /. ADO /. prms
ADOP1 = RegionPlot[Evaluate[(EV0 /. ADO /. prms)] < 0,
  {cDrive, 0, 1}, {h0D, 0, 1}, PlotRangePadding → None,
  PlotStyle → RGBColor[0, 0, 1, 0.2], BoundaryStyle → Blue];
ADOP2 = RegionPlot[Evaluate[(EVD1 /. ADO /. prms)] < 0 &&
  Evaluate[(EVD2 /. ADO /. prms)] < 0,
  {cDrive, 0, 1}, {h0D, 0, 1}, PlotRangePadding → None,
  PlotStyle → RGBColor[1, 0, 0, 0.2], BoundaryStyle → Red];
AZ0 = InvasionPic[ADOP1, ADOP2]
Export["../pics/invasionE_Zd.pdf", AZ0]

```

```
Out[ ]:= {Ntot → 0.4 KK}
```

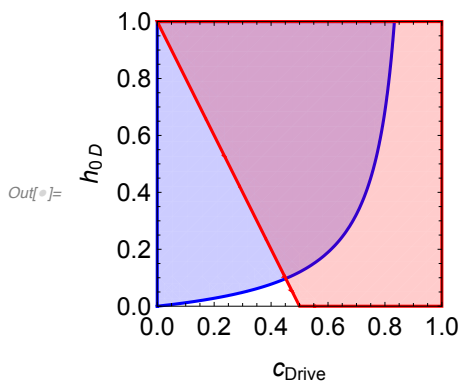

```
Out[ ]:= ../pics/invasionE_Zd.pdf
```

### Legend:

WT - only equilibrium is locally stable in the region left of the blue curve,  
 Drive - only equilibrium is locally stable in the region right of the red curve.

Purple: both equilibria are locally stable; bistability

White: none of the two boundary equilibria is locally stable: coexistence of WT and drive

Interior equilibrium for the parameters tested in R

```

In[ ]:= neqs =
  Flatten[Evaluate[{DdGNtot == 0, DdGpD == 0, DdGHW == 0} /. demog /. ADO /. prms /.
    KK → 25 000 /. h0D → 1 /. cDrive → 0.6]];
NSolve[neqs, {Ntot, pD, dHW}, Reals]
Out[ ]:= {{dHW → 0, pD → 1., Ntot → -2500.},
  {dHW → -0.0330327, pD → 0.195531, Ntot → 5796.09}, {dHW → 0, pD → 0, Ntot → 10 000.}}

```

## Fecundity only

Here we assume that only fecundity is affected by the drive

```

In[ ]:= FO = {w00 → 1, w0D → 1, wDD → 1, d00 → 0.6,
  d0D → 0.6, dDD → 0.6, β0D → β00 (1 - h0D) + βDD h0D};

```

```

In[ ]:= prms = { $\beta_{00} \rightarrow 1$ ,  $\beta_{DD} \rightarrow 0.738$ };
FOP1 = RegionPlot[(EV0 /. F0 /. prms) < 0,
  {CDrive, 0, 1}, {h0D, 0, 1}, PlotRangePadding → None,
  PlotStyle → RGBColor[0, 0, 1, 0.2], BoundaryStyle → Blue];
FOP2 = RegionPlot[Evaluate[(EVD1 /. F0 /. prms)] < 0 &&
  Evaluate[(EVD2 /. F0 /. prms)] < 0,
  {CDrive, 0, 1}, {h0D, 0, 1}, PlotRangePadding → None,
  PlotStyle → RGBColor[1, 0, 0, 0.2], BoundaryStyle → Red];
FZ0 = InvasionPic[FOP1, FOP2]
Export["../pics/invasionE_Zbeta.pdf", FZ0]

```

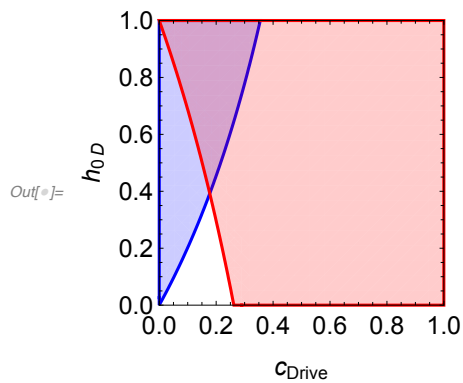

```
Out[ ]:= ../pics/invasionE_Zbeta.pdf
```

**Legend :** see above (Adult death only)

Interior equilibrium for the parameters tested in R

```

In[ ]:= neqs = Flatten[Evaluate[
  {DdGNtot == 0, DdGpD == 0, DdGHW == 0} /. demog /. F0 /. prms /. KK → 25 000 /.
  h0D → 1 /. CDrive → 0.3]];
NSolve[neqs, {Ntot, pD, dHW}, Reals]
Out[ ]:= {{dHW → 0, pD → 1., Ntot → -2540.93}, {dHW → 0, pD → 0.154962, Ntot → 7472.42},
  {dHW → 0, pD → 0, Ntot → 10 000.}, {Ntot → 10 000., pD → 0, dHW → 0}}

```

## Zygote viability only

```

In[ ]:= Z0 = {d00 → 0.6, d0D → 0.6, dDD → 0.6,
   $\beta_{00} \rightarrow 1$ ,  $\beta_{0D} \rightarrow 1$ ,  $\beta_{DD} \rightarrow 1$ ,  $\omega_{0D} \rightarrow \omega_{00} (1 - h_{0D}) + \omega_{DD} h_{0D}$ };

```

```

In[ ]:= prms = {ω00 → 1, ωDD → 0.545};
ZOP1 = RegionPlot[(EV0 /. ZO /. prms) < 0,
  {cDrive, 0, 1}, {h0D, 0, 1}, PlotRangePadding → None,
  PlotStyle → RGBColor[0, 0, 1, 0.2], BoundaryStyle → Blue];
ZOP2 = RegionPlot[Evaluate[(EVD1 /. ZO /. prms)] < 0 &&
  Evaluate[(EVD2 /. ZO /. prms)] < 0,
  {cDrive, 0, 1}, {h0D, 0, 1}, PlotRangePadding → None,
  PlotStyle → RGBColor[1, 0, 0, 0.2], BoundaryStyle → Red];
OmegaZ0 = InvasionPic[ZOP1, ZOP2]
Export["../pics/invasionE_Zomega.pdf", OmegaZ0]

```

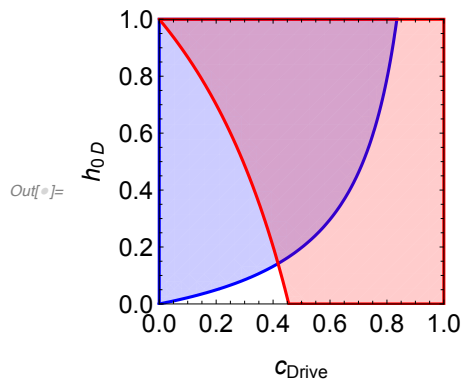

Out[ ]:= ../pics/invasionE\_Zomega.pdf

**Legend** : see above (Adult death only)

Interior equilibrium for the parameters tested in R

```

In[ ]:= neqs = Flatten[Evaluate[
  {DdGNtot == 0, DdGpD == 0, DdGHW == 0} /. demog /. ZO /. prms /. KK → 25 000 /.
  h0D → 1 /. cDrive → 0.5]];
NSolve[neqs, {Ntot, pD, dHW}, Reals]

```

Out[ ]:= {{dHW → 0, pD → 1., Ntot → -2522.94},  
 {Ntot → 3819.56, pD → 0.308668, dHW → -0.0570609}, {dHW → 0, pD → 0, Ntot → 10 000.}}

## Plot the types of equilibria -- replacement drive

```

In[ ]:= EVD1 = .; EVD2 = .;
EVD1r = evZDr[[3]];
EVD2r = evZDr[[2]];

```



## Adult death only

```

In[ ]:= prms = {d00 → 0.6, dDD → 0.7};
ADOP1 = RegionPlot[Evaluate[(EV0 /. ADO /. prms)] < 0,
  {cDrive, 0, 1}, {h0D, 0, 1}, PlotRangePadding → None,
  PlotStyle → RGBColor[0, 0, 1, 0.2], BoundaryStyle → Blue];
ADOP2 = RegionPlot[Evaluate[(EVD1r /. ADO /. prms)] < 0 &&
  Evaluate[(EVD2r /. ADO /. prms)] < 0,
  {cDrive, 0, 1}, {h0D, 0, 1}, PlotRangePadding → None,
  PlotStyle → RGBColor[1, 0, 0, 0.2], BoundaryStyle → Red];
AZ0 = InvasionPic[ADOP1, ADOP2]
Export["../pics/invasionR_Zd.pdf", AZ0]

```

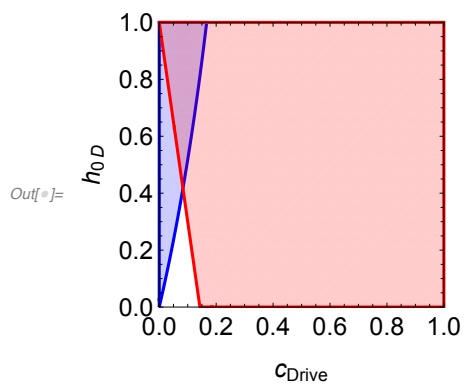

Out[ ]:= ../pics/invasionR\_Zd.pdf

## Fecundity only

```

In[ ]:= prms = {β00 → 1, βDD → 0.93};
FOP1 = RegionPlot[(EV0 /. F0 /. prms) < 0,
  {cDrive, 0, 1}, {h0D, 0, 1}, PlotRangePadding → None,
  PlotStyle → RGBColor[0, 0, 1, 0.2], BoundaryStyle → Blue];
FOP2 = RegionPlot[Evaluate[(EVD1r /. F0 /. prms)] < 0 &&
  Evaluate[(EVD2r /. F0 /. prms)] < 0,
  {cDrive, 0, 1}, {h0D, 0, 1}, PlotRangePadding → None,
  PlotStyle → RGBColor[1, 0, 0, 0.2], BoundaryStyle → Red];
FZ0 = InvasionPic[FOP1, FOP2]
Export["../pics/invasionR_Zbeta.pdf", FZ0]

```

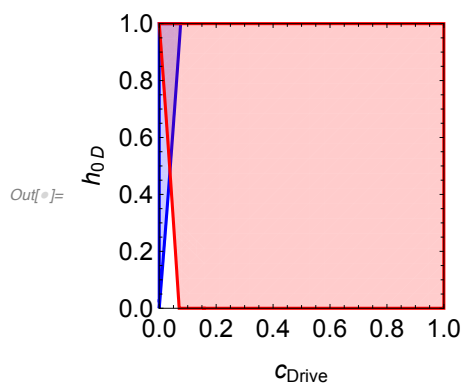

Out[ ]:= ../pics/invasionR\_Zbeta.pdf

## Zygote viability only

```

In[ ]:= prms = {ω00 → 1, ωDD → 0.86};
ZOP1 = RegionPlot[(EV0 /. ZO /. prms) < 0,
  {cDrive, 0, 1}, {h0D, 0, 1}, PlotRangePadding → None,
  PlotStyle → RGBColor[0, 0, 1, 0.2], BoundaryStyle → Blue];
ZOP2 = RegionPlot[Evaluate[(EVD1r /. ZO /. prms)] < 0 &&
  Evaluate[(EVD2r /. ZO /. prms)] < 0,
  {cDrive, 0, 1}, {h0D, 0, 1}, PlotRangePadding → None,
  PlotStyle → RGBColor[1, 0, 0, 0.2], BoundaryStyle → Red];
OmegaZ0 = InvasionPic[ZOP1, ZOP2]
Export["../pics/invasionR_Zomega.pdf", OmegaZ0]

```

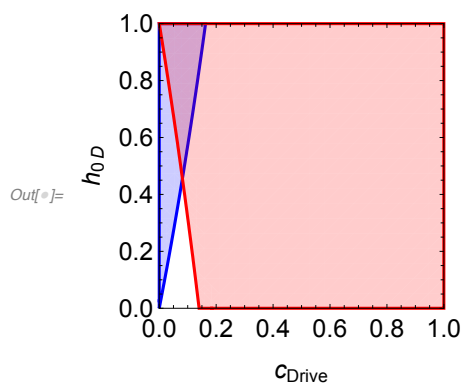

Out[ ]:= ../pics/invasionR\_Zomega.pdf

## Model with Brake

### Model definition

#### Original variables

Zygote conversion

- Create gamete vector,
- Compute the different crossings;
- From this, deduce the different fertilized eggs ( $0D=D0$ );
- Let gene conversion take place

Abundance of the different genotypes right after fusion of the gametes

$$\text{Vegg} = \frac{\begin{pmatrix} \{\text{scaled}\}.\text{Cross00}.\text{scaled} \\ \{\text{scaled}\}.\text{Cross0D}.\text{scaled} \\ \{\text{scaled}\}.\text{CrossDD}.\text{scaled} \\ \{\text{scaled}\}.\text{Cross0B}.\text{scaled} \\ \{\text{scaled}\}.\text{CrossDB}.\text{scaled} \\ \{\text{scaled}\}.\text{CrossBB}.\text{scaled} \end{pmatrix}}{(\text{Ntot})^2 // \text{FullSimplify};$$

Out[\*]:=MatrixForm=

$$\begin{pmatrix} \frac{(2 n_{00} \beta_{00} + n_{0B} \beta_{0B} + n_{0D} \beta_{0D})^2}{4 N_{\text{tot}}^2} \\ \frac{(2 n_{00} \beta_{00} + n_{0B} \beta_{0B} + n_{0D} \beta_{0D}) (n_{0D} \beta_{0D} + n_{DB} \beta_{DB} + 2 n_{DD} \beta_{DD})}{2 N_{\text{tot}}^2} \\ \frac{(n_{0D} \beta_{0D} + n_{DB} \beta_{DB} + 2 n_{DD} \beta_{DD})^2}{4 N_{\text{tot}}^2} \\ \frac{(2 n_{00} \beta_{00} + n_{0B} \beta_{0B} + n_{0D} \beta_{0D}) (n_{0B} \beta_{0B} + 2 n_{BB} \beta_{BB} + n_{DB} \beta_{DB})}{2 N_{\text{tot}}^2} \\ \frac{(n_{0B} \beta_{0B} + 2 n_{BB} \beta_{BB} + n_{DB} \beta_{DB}) (n_{0D} \beta_{0D} + n_{DB} \beta_{DB} + 2 n_{DD} \beta_{DD})}{2 N_{\text{tot}}^2} \\ \frac{(n_{0B} \beta_{0B} + 2 n_{BB} \beta_{BB} + n_{DB} \beta_{DB})^2}{4 N_{\text{tot}}^2} \end{pmatrix}$$

Gene conversion in the zygote

```
In[*]:= NVG = Conversion.Vegg // Flatten;
NVG // MatrixForm
```

Out[\*]:=MatrixForm=

$$\begin{pmatrix} \frac{(2 n_{00} \beta_{00} + n_{0B} \beta_{0B} + n_{0D} \beta_{0D})^2}{4 N_{\text{tot}}^2} \\ \frac{(2 n_{00} \beta_{00} + n_{0B} \beta_{0B} + n_{0D} \beta_{0D}) (n_{0D} \beta_{0D} + n_{DB} \beta_{DB} + 2 n_{DD} \beta_{DD}) (1 - C_{\text{Drive}})}{2 N_{\text{tot}}^2} \\ \frac{(n_{0D} \beta_{0D} + n_{DB} \beta_{DB} + 2 n_{DD} \beta_{DD})^2}{4 N_{\text{tot}}^2} + \frac{(2 n_{00} \beta_{00} + n_{0B} \beta_{0B} + n_{0D} \beta_{0D}) (n_{0D} \beta_{0D} + n_{DB} \beta_{DB} + 2 n_{DD} \beta_{DD}) C_{\text{Drive}}}{2 N_{\text{tot}}^2} \\ \frac{(2 n_{00} \beta_{00} + n_{0B} \beta_{0B} + n_{0D} \beta_{0D}) (n_{0B} \beta_{0B} + 2 n_{BB} \beta_{BB} + n_{DB} \beta_{DB})}{2 N_{\text{tot}}^2} \\ \frac{(n_{0B} \beta_{0B} + 2 n_{BB} \beta_{BB} + n_{DB} \beta_{DB}) (n_{0D} \beta_{0D} + n_{DB} \beta_{DB} + 2 n_{DD} \beta_{DD}) (1 - C_{\text{Brake}})}{2 N_{\text{tot}}^2} \\ \frac{(n_{0B} \beta_{0B} + 2 n_{BB} \beta_{BB} + n_{DB} \beta_{DB})^2}{4 N_{\text{tot}}^2} + \frac{(n_{0B} \beta_{0B} + 2 n_{BB} \beta_{BB} + n_{DB} \beta_{DB}) (n_{0D} \beta_{0D} + n_{DB} \beta_{DB} + 2 n_{DD} \beta_{DD}) C_{\text{Brake}}}{2 N_{\text{tot}}^2} \end{pmatrix}$$

Dynamics of the different genotypes

```
In[*]:= dZn00 = NVG[[1]] omega00 Birth[Ntot] - d00 Death[Ntot] n00;
dZn0D = NVG[[2]] omega0D Birth[Ntot] - d0D Death[Ntot] n0D;
dZnDD = NVG[[3]] omegaDD Birth[Ntot] - dDD Death[Ntot] nDD;
dZn0B = NVG[[4]] omega0B Birth[Ntot] - d0B Death[Ntot] n0B;
dZnDB = NVG[[5]] omegaDB Birth[Ntot] - dDB Death[Ntot] nDB;
dZnBB = NVG[[6]] omegaBB Birth[Ntot] - dBB Death[Ntot] nBB;
```

Export for C

The demographic functions are such that the death rate is constant and fecundity is density dependent

In[\*]:=

```
In[*]:= dZn00 /. chgvar // CForm
```

```
Out[*]:=CForm= -(d00*pop(0)) + (omega00*(1 - popsize/K)*Power(2*beta00*pop(0) + beta0D*pop(1)
```

```
In[*]:= dZn0D /. chgvar // CForm
```

```
Out[*]:=CForm= -(d0D*pop(1)) + ((1 - conversionD)*omega0D*(1 - popsize/K)*(2*beta00*pop(0) + 1
(2.*popsize)
```

In[\*]:= dZnDD /. chgvar // CForm

Out[\*]//CForm=  $-(dDD * pop(2)) + \omega_{DD} * popsize * (1 - popsize/K) * ((conversionD * (2 * \beta_{00} * pop(0) + \beta_{0D} * pop(1) + 2 * \beta_{DD} * pop(2) + \beta_{DB} * pop(4))) / (2 * Power(popsize, 2) + Power(\beta_{0D} * pop(1) + 2 * \beta_{DD} * pop(2) + \beta_{DB} * pop(4), 2)) / (4 * Power(popsize, 2))$

In[\*]:= dZn0B /. chgvar // CForm

Out[\*]//CForm=  $-(d0B * pop(3)) + (\omega_{0B} * (1 - popsize/K) * (2 * \beta_{00} * pop(0) + \beta_{0D} * pop(1) + \beta_{0B} * pop(3) + \beta_{0DB} * pop(4))) / (2 * Power(popsize, 2) + Power(\beta_{0D} * pop(1) + \beta_{0B} * pop(3) + \beta_{0DB} * pop(4), 2)) / (4 * Power(popsize, 2))$

In[\*]:= dZnDB /. chgvar // CForm

Out[\*]//CForm=  $-(dDB * pop(4)) + ((1 - conversionB) * \omega_{DB} * (1 - popsize/K) * (\beta_{0D} * pop(1) + 2 * \beta_{DD} * pop(2) + \beta_{DB} * pop(4) + 2 * \beta_{BB} * pop(5))) / (2 * Power(popsize, 2) + Power(\beta_{0D} * pop(1) + 2 * \beta_{DD} * pop(2) + \beta_{DB} * pop(4) + 2 * \beta_{BB} * pop(5), 2)) / (4 * Power(popsize, 2))$

In[\*]:= dZnBB /. chgvar // CForm

Out[\*]//CForm=  $-(dBB * pop(5)) + \omega_{BB} * popsize * (1 - popsize/K) * ((conversionB * (\beta_{0D} * pop(1) + \beta_{0B} * pop(3) + \beta_{DB} * pop(4) + 2 * \beta_{BB} * pop(5))) / (2 * Power(popsize, 2) + Power(\beta_{0D} * pop(1) + \beta_{0B} * pop(3) + \beta_{DB} * pop(4) + 2 * \beta_{BB} * pop(5), 2)) / (4 * Power(popsize, 2))$

Abundance of the different alleles (/2)

In[\*]:=  $dZn0 = dZn00 + 1/2 dZn0D + 1/2 dZn0B // FullSimplify;$   
 $dZnD = dZnDD + 1/2 dZn0D + 1/2 dZnDB // FullSimplify;$   
 $dZnB = dZnBB + 1/2 dZn0B + 1/2 dZnDB // FullSimplify;$

## New variables

Rewrite the dynamics with the new variables

Total population size

In[\*]:= dZNtot = FullSimplify[dZn0 + dZnD + dZnB] /. solCV3;

Frequencies of Drive and Brake

In[\*]:=  $dZpD = \frac{dZnD}{N_{tot}} - \frac{(n_{DD} + 1/2 n_{0D} + 1/2 n_{0B}) dZN_{tot}}{N_{tot}^2} /. solCV3;$   
 $dZpB = \frac{dZnB}{N_{tot}} - \frac{(n_{BB} + 1/2 n_{0B} + 1/2 n_{DB}) dZN_{tot}}{N_{tot}^2} /. solCV3;$

Deviation from Hardy - Weinberg

In[\*]:=  $dZHW0D = \frac{-n_{0D} dZN_{tot} + N_{tot} (dZn0D + 2 N_{tot} (p_D dZpB + (-1 + p_B + 2 p_D) dZpD))}{N_{tot}^2} /. solCV3;$   
 $dZHWDB = \frac{N_{tot} dZnDB - n_{DB} dZN_{tot}}{N_{tot}^2} - 2 (p_D dZpB + p_B dZpD) /. solCV3;$   
 $dZHW0B = \frac{-n_{0B} dZN_{tot} + N_{tot} (dZn0B + 2 N_{tot} (p_B dZpD + (-1 + p_D + 2 p_B) dZpB))}{N_{tot}^2} /. solCV3;$

## Equilibrium stability

### Stability of the WT only equilibrium

Jacobian matrix

In[\*]:= JacZ =

$$\begin{pmatrix} D[dZNtot, Ntot] & D[dZNtot, pD] & D[dZNtot, pB] & D[dZNtot, diffHW0D] & D[dZNtot, diffH \\ D[dZpD, Ntot] & D[dZpD, pD] & D[dZpD, pB] & D[dZpD, diffHW0D] & D[dZpD, diffHW \\ D[dZpB, Ntot] & D[dZpB, pD] & D[dZpB, pB] & D[dZpB, diffHW0D] & D[dZpB, diffHW \\ D[dZHW0D, Ntot] & D[dZHW0D, pD] & D[dZHW0D, pB] & D[dZHW0D, diffHW0D] & D[dZHW0D, diffH \\ D[dZHW0B, Ntot] & D[dZHW0B, pD] & D[dZHW0B, pB] & D[dZHW0B, diffHW0D] & D[dZHW0B, diffH \\ D[dZHWDB, Ntot] & D[dZHWDB, pD] & D[dZHWDB, pB] & D[dZHWDB, diffHW0D] & D[dZHWDB, diffH \end{pmatrix}$$

Out[\*]:=

... 1 ...

large output
show less
show more
show all
set size limit...

WT-only stability -- check that the equilibrium is correct

In[\*]:= {dZNtot, dZpD, dZpB, dZHW0D, dZHW0B, dZHWDB} /. demog /.

{pD → 0, pB → 0, diffHW0B → 0, diffHW0D → 0, diffHWDB → 0} /. sol0 // AF

Out[\*]:= {0, 0, 0, 0, 0, 0}

Eigenvalues

In[\*]:= evZWT = Eigenvalues[AF[JacZ /. demog /.

{pD → 0, pB → 0, diffHW0B → 0, diffHW0D → 0, diffHWDB → 0} /. sol0]] // AF

$$\begin{aligned} \text{Out[*]} = & \left\{ -d_{BB}, -d_{DB}, d_{00} - \beta_{00}^2 \omega_{00}, -d_{0B} + \frac{d_{00} \beta_{0B} \omega_{0B}}{\beta_{00} \omega_{00}}, \right. \\ & - \frac{1}{2 \beta_{00} \omega_{00}} \left( d_{0D} \beta_{00} \omega_{00} + d_{DD} \beta_{00} \omega_{00} - d_{00} \beta_{0D} \omega_{0D} + d_{00} \beta_{0D} \omega_{0D} c_{Drive} - 2 d_{00} \beta_{DD} \omega_{DD} \right. \\ & \quad \left. c_{Drive} + \sqrt{\left( (d_{0D} + d_{DD}) \beta_{00} \omega_{00} - d_{00} \beta_{0D} \omega_{0D} + d_{00} (\beta_{0D} \omega_{0D} - 2 \beta_{DD} \omega_{DD}) c_{Drive} \right)^2 +} \right. \\ & \quad \left. 4 \beta_{00} \omega_{00} (-d_{0D} d_{DD} \beta_{00} \omega_{00} + d_{00} d_{DD} \beta_{0D} \omega_{0D} + \right. \\ & \quad \left. d_{00} (-d_{DD} \beta_{0D} \omega_{0D} + 2 d_{0D} \beta_{DD} \omega_{DD}) c_{Drive} \right) \Big), \\ & \frac{1}{2 \beta_{00} \omega_{00}} \left( -d_{0D} \beta_{00} \omega_{00} - d_{DD} \beta_{00} \omega_{00} + d_{00} \beta_{0D} \omega_{0D} - d_{00} \beta_{0D} \omega_{0D} c_{Drive} + \right. \\ & \quad \left. 2 d_{00} \beta_{DD} \omega_{DD} c_{Drive} + \sqrt{\left( (d_{0D} + d_{DD}) \beta_{00} \omega_{00} - d_{00} \beta_{0D} \omega_{0D} + d_{00} (\beta_{0D} \omega_{0D} - 2 \beta_{DD} \omega_{DD}) c_{Drive} \right)^2 +} \right. \\ & \quad \left. 4 \beta_{00} \omega_{00} (-d_{0D} d_{DD} \beta_{00} \omega_{00} + d_{00} d_{DD} \beta_{0D} \omega_{0D} + \right. \\ & \quad \left. d_{00} (-d_{DD} \beta_{0D} \omega_{0D} + 2 d_{0D} \beta_{DD} \omega_{DD}) c_{Drive} \right) \Big) \Big\} \end{aligned}$$

Comparison to the value that was previously found -> same

In[\*]:= evZWT[[6]] - evZ0[[3]] // AF

Out[\*]:= 0
