# Supplementary material
Source: publisher figshare collection journal article supplement (https://gsajournals.figshare.com/articles/dataset/_/12732782)
Supplement: Supplementary file 35 [file 2]

- WT recovery (drive and brake absent)
  - Drive absent, brake still present
  - Drive still present
  - Extinction
  - Drive loss before brake introduction
  - Extinction before brake introduction
- after brake introduction
